# Dorsal CA1 Hippocampal Place Cells Form a Multi-Scale Representation of Megaspaces

B.C. Harland<sup>1,2</sup>, M. Contreras<sup>1</sup>, M. Souder<sup>1</sup>, J.M. Fellous<sup>1,3</sup>

Spatially firing “place cells” within the hippocampal CA1 region form internal maps of the environment necessary for navigation and memory. In rodents, these neurons have been almost exclusively studied in small environments (<4 m<sup>2</sup>). It remains unclear how place cells encode a very large open 2D environment, which is more analogous to the natural environments experienced by rodents and other mammals. Such an ethologically realistic environment would require a more complex spatial representation, capable of simultaneously representing space at overlapping multiple fine to coarse informational scales. Here we show that in a ‘megaspaces’ (18.6 m<sup>2</sup>), the majority of dorsal CA1 place cells exhibited multiple place subfields of different sizes, akin to those observed along the septo-temporal axis. Furthermore, the total area covered by the subfields of each cell was not correlated with the number of subfields, and this total area increased with the scale of the environment. The multiple different-sized subfields exhibited by place cells in the megaspaces suggest that the ensemble population of subfields form a multi-scale representation of space within the dorsal hippocampus. Our findings point to a new dorsal hippocampus ensemble coding scheme that simultaneously supports navigational processes at both fine- and coarse-grained resolutions.

**Keywords:** Place cell, large environment, multi-scale, dorsal CA1, place field

**In Submission**

## Introduction

Seminal place cell studies found that the majority of place cells formed a single field in the ‘classic’ environments (<1 m<sup>2</sup>) tested [1-3]. When such environments were expanded, place field size also expanded [2, 4]. It was also shown that individual place cells along the dorso-ventral axis of the hippocampus coded areas of increasingly larger sizes [1, 5]. Taken together, these findings suggested that the larger ventral hippocampus place fields may be involved in representing large-scale environments. How this multi-scale information is effectively integrated and used is however unknown, especially given the dynamic nature of the code as observed through, for example, remapping experiments [6]. An alternative theory is that the multi-scale nature of the spatial code is not purely predicated on the anatomical location of place cells, and that it is the result of dynamic ensemble coding throughout the entirety of the hippocampus [7]. However, experimental support for ensemble place cell coding of multiple spatial scales has, to this day, been lacking.

Fenton et al. (2008) showed that in a larger classic environment (2.1 m<sup>2</sup>), place cells have multiple irregularly arranged, enlarged place fields. Since then, several studies have further reported multi-field place cells on long linear running tracks (10.3m, 18m, and 48m)[5, 8, 9] in rats, and a 200m tunnel in bats [10]. However, because animals are constrained to run in a

<sup>1</sup>Computational and Experimental Neuroscience Laboratory, Department of Psychology, University of Arizona, Tucson, USA. <sup>2</sup>School of Pharmacy, University of Auckland, New Zealand. <sup>3</sup>Department of Biomedical Engineering, University of Arizona, Tucson, USA. \*email: [fellous@email.arizona.edu](mailto:fellous@email.arizona.edu).

44 particular direction in these linear environments, place cells operate differently than in open-fields,  
45 by forming for example, bi-directional selectivity [11]. In a large open-field arena (2.5 m<sup>2</sup>), Park  
46 et al. (2011) showed multiple field place cells in dorsal hippocampal CA1, CA3, and dentate gyrus.  
47 While the area of the largest subfield per cell increased on average from a small to a larger  
48 environment, no significant change in area was noted when all subfields were accounted for, unlike  
49 previous studies which showed that the average field size increased [2, 12]. Overall, this  
50 experimental work challenged existing place cell models, which were based on the idea of one-  
51 place-cell / one-location. This resulted in an alternative computational model positing the existence  
52 of a ‘megamap’ in which individual place cells feature multiple subfields of similar sizes, capable  
53 of enlarging to fill any infinite space [13]. Experimentally, it is still unclear how enlarged multiple-  
54 field place cells would effectively encode a large ‘megaspaces’ at multiple spatial scales.  
55 Understanding how place cells encode multiple spatial scales has additional theoretical value as  
56 these same hippocampal neurons are thought to be involved in encoding human autobiographical  
57 memory along multi-scale mnemonic hierarchies [14-16].

58 Here, we compared place cell properties in a megaspaces (18.6 m<sup>2</sup>), considerably larger than  
59 previous published studies, with those in a classic environment. We used wireless recording and a  
60 new behavioural paradigm in which rats were trained to follow a small food-baited robot to obtain  
61 place cell recordings with sufficient coverage within the megaspaces. We found that place cells  
62 exhibited multiple spatially distributed subfields of many sizes in the megaspaces. We found that  
63 the average place field size increased with the size of the environment. We also show that the  
64 subfields of each individual cell were of different sizes and that the number of subfields per cell  
65 was not correlated with the total area covered by a cells subfields.

## 67 **Results**

### 69 *Robot following facilitated high resolution place cell recordings in the megaspaces*

71 Rats were recorded in a megaspaces (5.3 x 3.5 m; 18.6 m<sup>2</sup>, Fig. 1A, Movie S1) in between  
72 visits to a smaller environment (1.8 x 1.2 m; 2.2 m<sup>2</sup>). The megaspaces is considerably larger than  
73 environments used in previously published studies to record place cells (Fig. 1B). To obtain  
74 sufficient coverage of this environment, we trained rats to follow a small food-baited robot  
75 (‘Sphero’) controlled by an experimenter (Fig. 1C). Previously, we have shown that rats can attend  
76 to their surrounding by learning an allocentric spatial task while following the robot and that place  
77 cells did not remap in a small environment during robot following [17]. Here, we compared  
78 behavioural and place cell parameters between separate robot following (N = 39) and traditional  
79 foraging (N = 15; Fig 1D) sessions using one-way Anova (see Fig. S1A-C for example  
80 trajectories). In the megaspaces, robot-following ensured greater behavioural coverage ( $F_{(1,53)} =$   
81  $25.43, P < 0.0001$ ; Fig. 1E) and movement velocity ( $F_{(1,53)} = 54.26, P < 0.0001$ ; Fig. 1F) compared  
82 with foraging. Similarly, coverage and velocity were also increased in the small environment in  
83 robot-following sessions (Fig. S1D-E).

84 There were no significant differences in place cell characteristics in the small environment  
85 between robot following and foraging sessions (Fig. S1F-I). Place cell characteristics in the  
86 megaspaces did not differ between session types for number of fields ( $F_{(1,381)} = 0.33, P = 0.57$ ; Fig.  
87 1G), average firing rate ( $F_{(1,381)} = 0.05, P = 0.83$ ; Fig. 1H), and mean size of place fields ( $F_{(1,381)} =$   
88  $1.15, P = 0.28$ ; Fig. 1I). The total area of place subfields for a given cell in the megaspaces was  
89 slightly higher for cells in robot-following sessions (mean=2.15m<sup>2</sup>; SD±0.47m<sup>2</sup>) than for cells

90 during foraging (mean=1.99m<sup>2</sup>; SD=0.44m<sup>2</sup>;  $F_{(1,381)} = 10.57$ ,  $P < 0.01$ ; Fig. 1J). This difference  
 91 was due to the lower average velocity in foraging sessions; when a sub-set of velocity-matched  
 92 robot following and foraging sessions (n = 6 each) were compared, there were no differences in  
 93 place cell characteristics, including total area of place subfields in the megaspace (Fig. S1L-P).  
 94 Robot following generally resulted in greater distances travelled in a shorter time (Fig. 1K) without  
 95 altering place cell function, therefore place cells in robot-following and foraging sessions were  
 96 pooled for all further analyses.

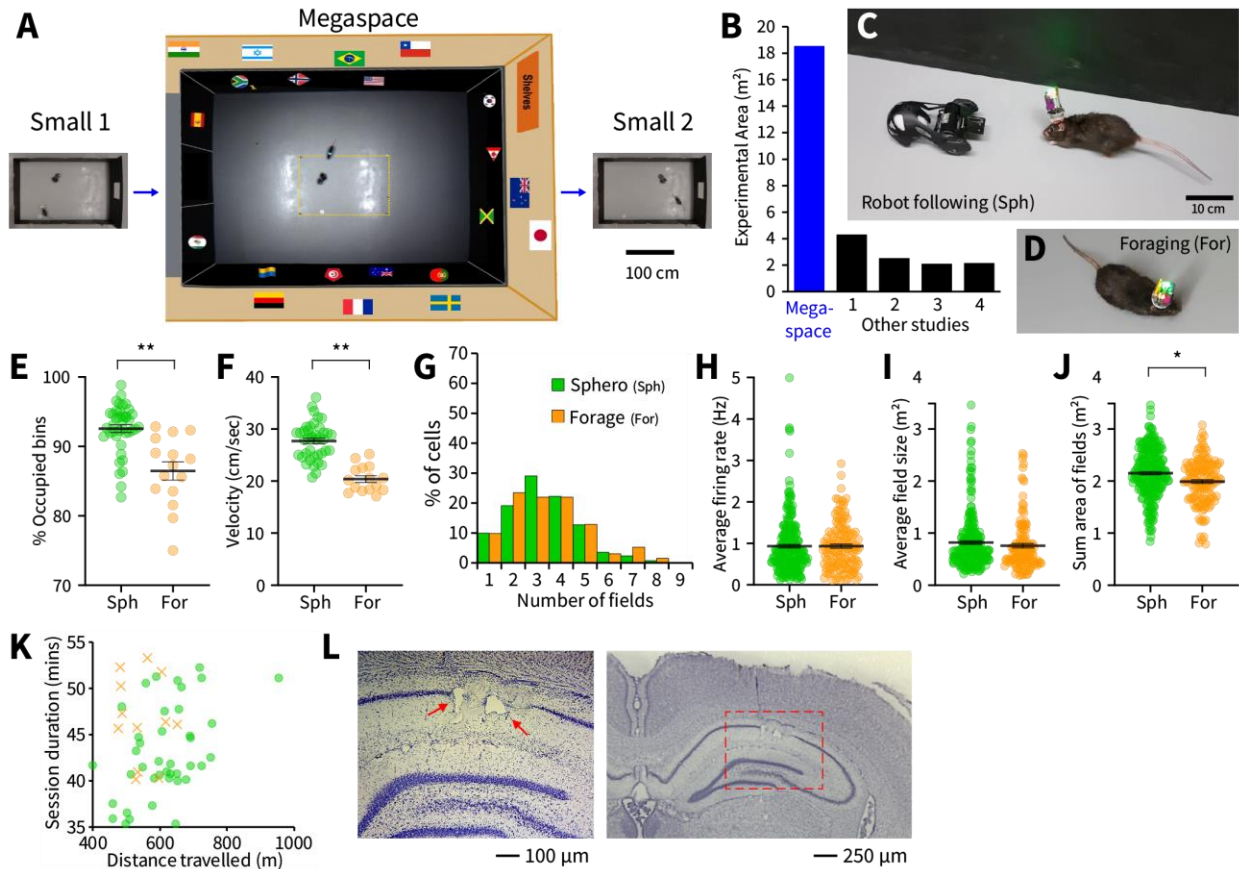

97  
 98 **Fig. 1: Methods and comparisons between robot-following and foraging sessions.** (A) Top  
 99 view of recording environments. Yellow dotted line shows position of small environment within  
 100 the megaspace (18.6 m<sup>2</sup>). (B) The megaspace is over four times larger than environments from  
 101 other published studies which also included dorsal CA1 place cell recordings: 1 = 48m track [9];  
 102 2 = Large box [7]; 3 = Monkey cage [12]; 4 = 18m track [5]. (C) Rats were trained to follow a  
 103 small baited robot ('Sphero'). A wireless headstage allowed for recordings in the megaspace.  
 104 Robot-following was compared with (D) traditional foraging. (E) Robot-following (Sph, green)  
 105 resulted in a greater fraction of the room covered by the occupancy map, and (F) greater average  
 106 speed in the megaspace than during classic foraging (For, orange). Place cells in the megaspace  
 107 had similar (G) numbers of subfields, (H) average firing rates, and (I) average place field sizes in  
 108 robot following and foraging sessions. (J) The sum area of place fields per cell was greater in robot  
 109 following sessions in the megaspace. (K) Robot-following sessions (green circles) yielded more  
 110 distance traveled in a smaller amount of time compared with foraging (orange crosses). (L)  
 111 Coronal section showing dorsal hippocampus. Arrowheads show electrolytic lesions indicating the  
 112 end of tetrode tracks. For all panels \* =  $P < 0.05$ , \*\* =  $P < 0.001$ .

113

114 *Most place cell had multiple subfields of different size in the megaspace*

115

116 We recorded 539 place cells from dorsal CA1 over 54 sessions in five rats (Small 1 –  
117 Megaspace – Small 2; Fig. 1A). Tetrode positions in the dorsal CA1 were confirmed histologically  
118 (Fig. 1L) and the position of each tetrode analyzed was verified to be within the CA1 area of the  
119 hippocampus (Fig. S2). To ensure that activity in the megaspace could not be explained by tetrode  
120 drift over the long sessions, only spatially firing place cells active in all three environments, with  
121 stable place fields in both small environments, were retained for analysis (n = 383 place cells; 71%  
122 of total place cells). We compared place cell characteristics between small 1, small 2, and the  
123 megaspace using one-way Anova's and Tukey's HSD tests.

124 Most place cells had multiple subfields with a broad range of sizes in the megaspace (Fig.  
125 2A; more examples shown in Fig. S3), exhibiting more spatial subfields per cell compared to  
126 within the small environments ( $F_{(2,1146)} = 405.6$ ,  $P$ 's < 0.0001). The majority of cells (82%)  
127 exhibited 2-5 subfields in the megaspace compared to 1-2 subfields (91%) in the small  
128 environments (Fig. 2B). Place subfields in the megaspace were also significantly larger on average,  
129 both in terms of the mean area of their subfields ( $F_{(2,1146)} = 560.2$ ,  $P$ 's < 0.0001; Fig. 2C) and their  
130 sum area ( $F_{(2,1146)} = 6203.5$ ,  $P$ 's < 0.0001; Fig. 2D). The up-scaled multiple-subfield representation  
131 yielded only 2% more relative coverage per place cell in the megaspace than in the small  
132 environment ( $F_{(2,1146)} = 95.4$ ,  $P$ 's < 0.0001; Fig. 2E), which was 8.8 times smaller in overall area.  
133 This coverage difference was reduced to 0.9% in a sample of megaspace and small environment  
134 visits matched for rat velocity (data not shown). Number of subfields, mean and sum area of  
135 subfields, and percentage of environment did not differ between Small 1 and Small 2 (Tukey's  
136 post-hoc comparisons,  $P$ 's > 0.85). Cells exhibited a comparable average firing rate in the different  
137 sized environments ( $F_{(2,1146)} = 1.92$ ,  $P = 0.15$ ), and the average firing rate in the megaspace was  
138  $0.93 \pm 0.64$  SD (Fig. 2F).

139 Most multi-field place cells in the megaspace had subfields that greatly ranged in size, with  
140 most cells (79%) having a subfield area range greater than  $0.6 \text{ m}^2$  (Fig. 2G). There was only a  
141 weak negative correlation between subfield area range and number of subfields suggesting cells  
142 with either few or many subfields had the capacity to be 'multi-scale' in the megaspace (Fig. 2H).  
143 We confirmed that place subfield locations were not correlated between the small environment  
144 and megaspace within each sessions (Fig. S4A-E), and that in a smaller 'classic environment'  
145 ( $< 1 \text{ m}^2$ ), most place cells (94%) had only one place field (Fig. S4F-I, 'very small').

146

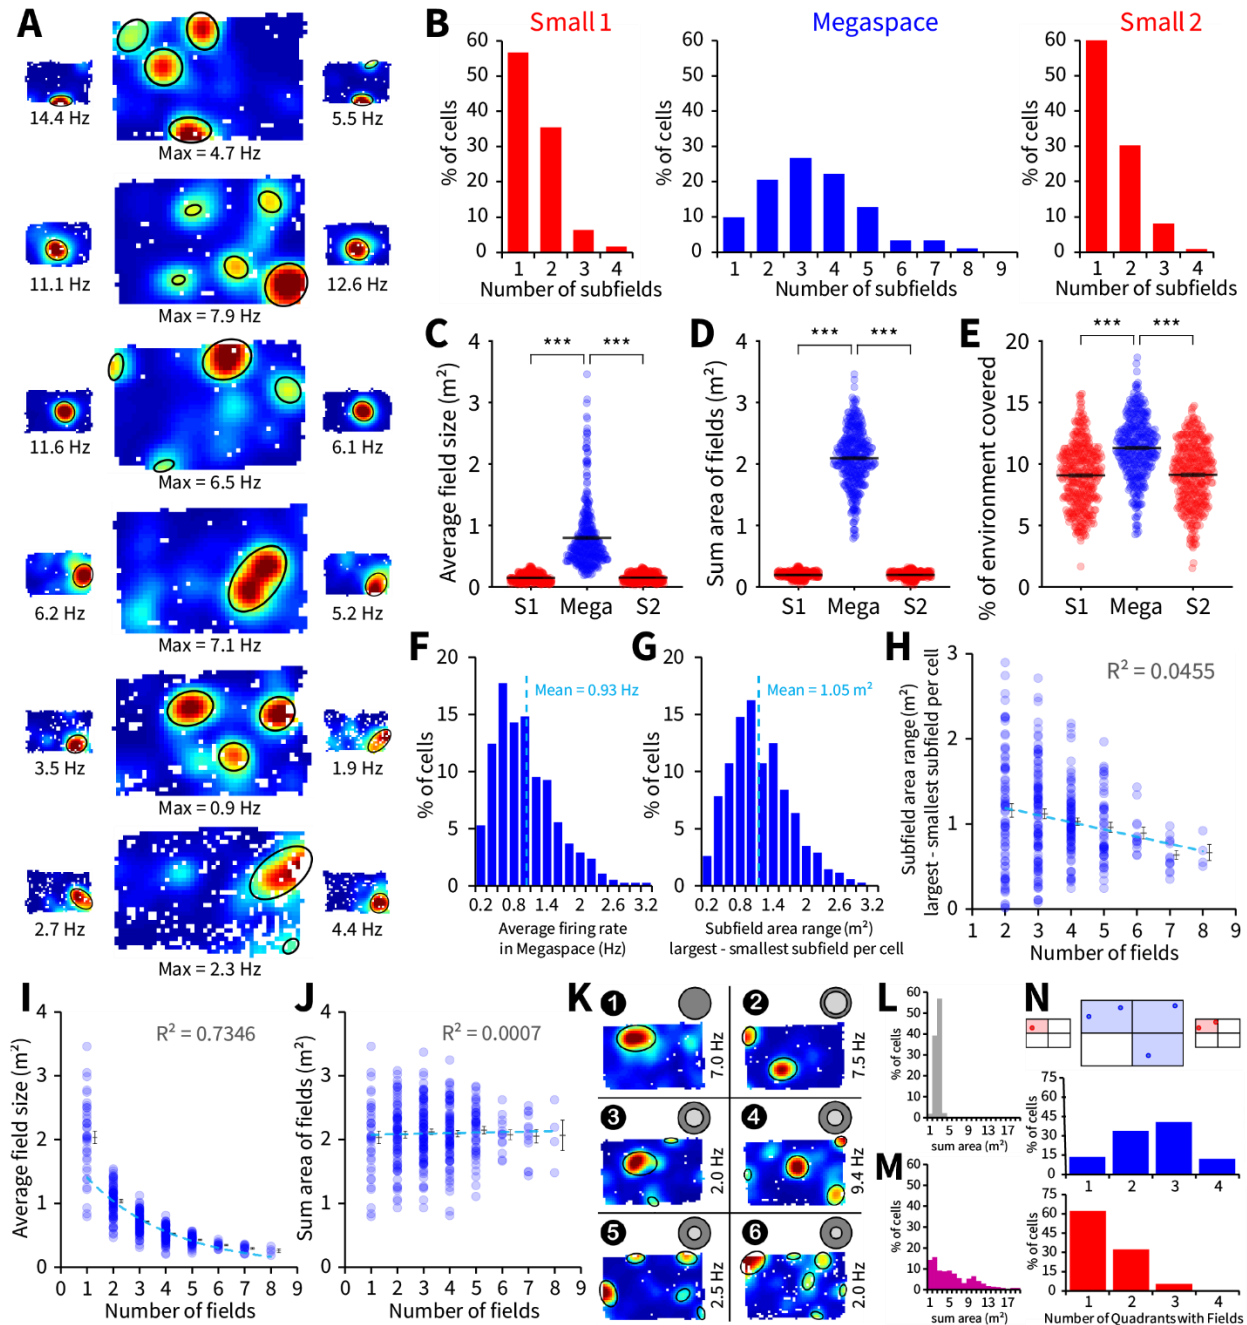

147

148 **Fig. 2: In the megaspace, place cells had multiple subfields of various sizes.** (A) Six different  
 149 representative place cells: top four cells recorded with robot-following, bottom two with foraging.  
 150 Place cells exhibited multiple subfields of varying size in the megaspace. (B) Number of place  
 151 subfields per cell for the three recording epochs. (C) Mean and (D) sum area of all subfields per  
 152 cell was significantly greater in the megaspace although (E) only ~2% more space is covered  
 153 compared to the small environment. (F) Average firing rate of place cells in the megaspace, only  
 154 cells with > 0.1 Hz average firing rate were considered place cells. (G) Most cells with at least two  
 155 subfields in the megaspace had a range of subfield sizes (area of largest – smallest subfield per  
 156 cell) greater than 0.6m<sup>2</sup>. (H) A linear trend suggested that most place cells could possess subfield  
 157 sizes of multiple scales, irrespective of their number of subfields. (I) In the megaspace, the average

158 subfield size decreases with the number of subfields per cell, however (**J**) the subfield sum area of  
159 cells was not correlated with the number of subfields. (**K**) Example of place cells with 1 – 6  
160 subfields, which have the mean sum area of fields shown in the outer dark-grey filled circle above  
161 each rate map, and the mean place field area shown in the inner light-grey filled circle. Number of  
162 subfields indicated above each graph, on the left. Sum area of subfields per cell is shown when (**L**)  
163 a cell-specific ( $> 1.2$  SD above mean) and (**M**) fixed ( $> 1$  Hz) firing rate threshold are used to  
164 define place fields, 45 out of 383 cells did not have fields using the fixed threshold. (**N**) Diagram  
165 showing a representative cell quantified for the number of quadrants containing subfields in each  
166 environment. The average number of quadrants occupied per cell with subfield centers is shown  
167 for the megaspace (blue) and small environment (red). For all panels \*\*\* =  $P < 0.0001$ .

168  
169 *In megaspace, the number of subfields a cell had was not correlated with the total area of floor*  
170 *space covered by the cell.*

171  
172 We next investigated the relationship between the number of subfields per cell and the  
173 megaspace area covered by those subfields. We found that the more subfields a cell possessed, the  
174 smaller the average size of these subfields, as described by a negative exponential distribution ( $r$   
175 = 0.86; Fig. 2I). In contrast, the average total area of all subfields remained constant irrespective  
176 of the numbers of subfields (linear fit,  $r = 0.027$ , Fig. 2J). Figure 2K, shows examples of different  
177 place cells with 1 to 6 subfields, each covering this average sum area of all subfields. However,  
178 comparing sum area across cells is problematic as the cell-specific threshold used for labelling  
179 place fields and the rejection of low firing rate cells ( $< 0.1$  Hz) resulted in a narrow range of  
180 subfield sum areas (Fig. 2L, S4J) compared to the wide range of sum areas evident when a 1 Hz  
181 threshold to define place fields was applied across all cells (Fig. 2M, also see S5).

182 One advantage of having multiple subfields is to allow each cell to contribute to an  
183 ensemble spatial representation in multiple regions within the environment. Indeed, most place  
184 cells in the megaspace had subfields distributed in 2-4 quadrants (86%), with the highest  
185 proportion covering 3 (Fig. 2N). In contrast, place cell's subfields in the small environment mostly  
186 covered 1-2 quadrants (95%) with the highest proportion of cells covering only 1.

187 The finding that cells in the megaspace possessed a wider range of place subfield sizes,  
188 persisted when we changed the bin-size (Fig. S4K-N), included a larger population of place cells  
189 (Fig. S4O-Q), used the fixed 1 Hz common threshold for labelling place fields (Fig. S5), and when  
190 a range of cell-specific firing rate thresholds for subfield detection were applied (Fig. S6). The  
191 lack of correlation between number of subfields and sum area of subfields also persisted but was  
192 slightly negatively correlated when the 1 Hz threshold was applied (Fig. S5E).

193  
194 *The ensemble of subfields in the megaspace formed a multi-scale representation of space*

195  
196 A subset of 125 (out of 383) cells were used to plot the set of 'idealized' (circular,  
197 equivalent area) place fields in the three environments, categorized into seven color-coded size  
198 ranges (Fig. 3A). This subset included only one cell (best isolation) per tetrode per session, and  
199 was used to ensure that findings were not contaminated by overlap errors in cluster cutting. Place  
200 fields in the smaller environments were all of a similar scale, mostly falling into the two smallest  
201 color-bands (purple and dark blue, Fig. 3A). In contrast, fields in the megaspace were of many  
202 different scales forming a near-uniform multi-scale representation of space (Fig. 3B) with  
203 increased variability of subfield sizes (Fig. 3C). A major functional advantage of the multiple-

204 place field representation in the megaspace was a significant increase in the number of overlapping  
205 subfields (One-way Anova:  $F_{(1,198)} = 12.21$ ,  $P < 0.001$ ; Fig. 3D) compared with the small  
206 environment. Such highly overlapping ensemble patterns of activity within a population of place  
207 cells can in principle accurately estimate location [7].

208 This ensemble of small and large overlapping place fields may contribute to both fine- and  
209 coarse-grained spatial representations of the environment as well as to the disambiguation of  
210 spatial location, with each location within the megaspace being uniquely characterized by a  
211 specific set of subfields of different sizes. Coarse-grained representations would support fast  
212 traversal of open space at the scale of meters whereas fine-grained representations would support  
213 higher resolution navigational operations at the scale of centimeters. A coarse-grained spatial  
214 representation would consist of very large overlapping place fields and would require much fewer  
215 fields than a fine-grained representation of smaller overlapping place fields (Fig. 3E). This may  
216 explain the distribution of place field sizes in the megaspace (Fig. 3F) which is well fitted by a  
217 negative exponential curve ( $r = 0.995$ ) with the majority of fields (78%) having an area of  $1\text{m}^2$  or  
218 less, and the remainder (22%) between  $1\text{m}^2$  and  $4\text{m}^2$ . In contrast, in the smaller environments, the  
219 distribution of subfield sizes was well fitted by a Gaussian function ( $r = 0.985$ ; Fig. 3G), although  
220 it became quasi linear when lower thresholds for labelling subfields were applied (Fig. S6F).  
221 Individual place subfields covered less fraction of the environment in the megaspace compared to  
222 the small environment (One-way Anova:  $F_{(2,2440)} = 196.37$ ,  $P < 0.0001$ ; Fig. 3H). We tested  
223 whether each cell's subfields had different peak firing rates, which could allow for within-cell  
224 differentiation of spatial position (Fig. 3I) and found that these firing rate differences were small,  
225 both in the megaspace and the small environments (Fig. 3J). Altogether, these data suggest that  
226 small and large overlapping place fields from many simultaneously active place cells form a multi-  
227 scale ensemble representation of the animal's position within the megaspace.

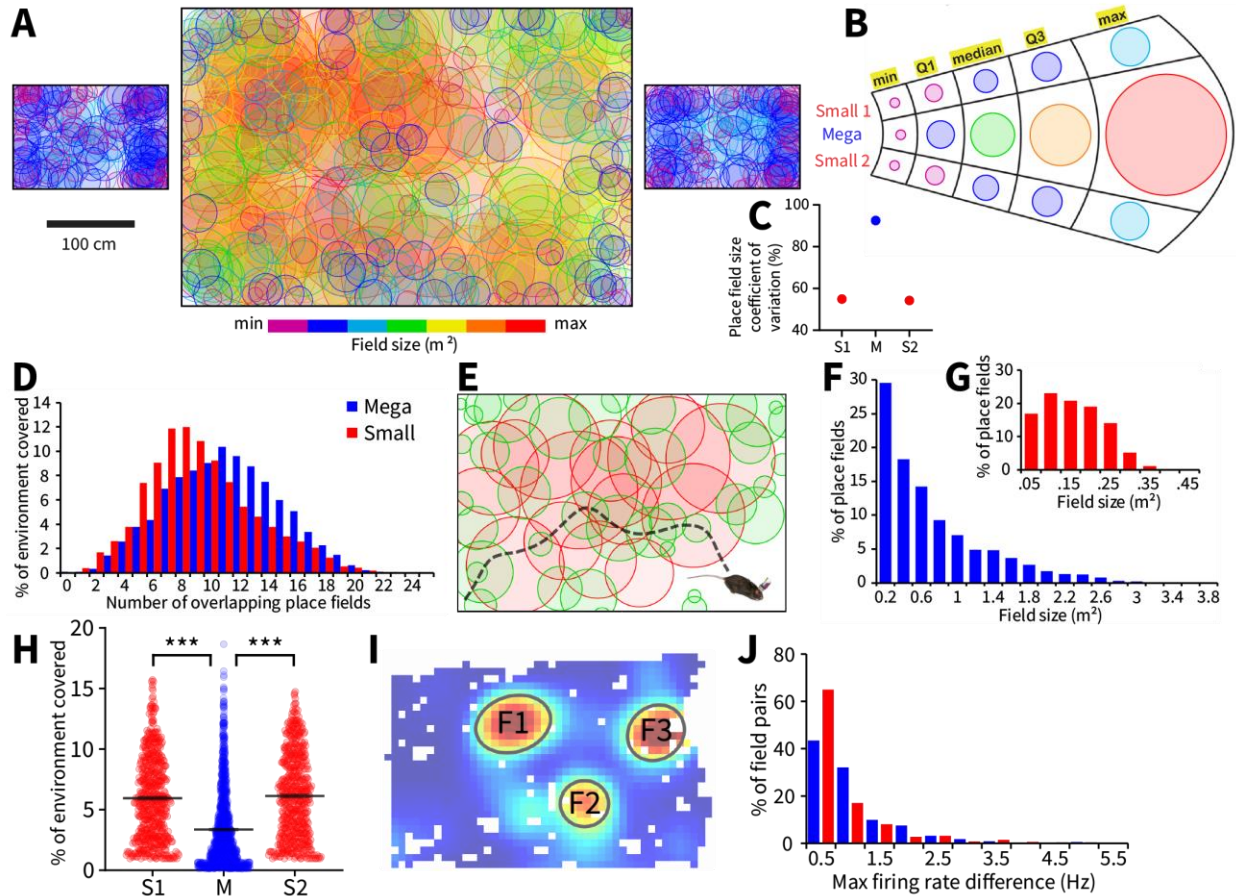

228  
 229 **Fig. 3: The population of place subfields formed a multi-scale representation of space in the**  
 230 **megaspace.** (A) Population of subfields from 125 well isolated place cells plotted in seven color-  
 231 bands based on their area in the megaspace from smallest (purple, 0.023 – 0.091 m<sup>2</sup>) to largest  
 232 (red, 1.23 – 3.46 m<sup>2</sup>). (B) There was a greater range of place field size in the megaspace than in  
 233 the small environments, (C) reflected by the greater variability in field size (D). There was a greater  
 234 degree of place subfield overlapping in the megaspace compared with the small environment. (E)  
 235 Cartoon illustrating the prediction that many more smaller place subfields (green circles, n = 40)  
 236 would be required in order to support finer-grain representations of the megaspace than large  
 237 subfields (red circles, n = 16) would be needed to support coarser-grained representations. (F) The  
 238 distribution of subfield sizes in the megaspace was consistent with this prediction (n = 1288  
 239 subfields). (G) There was a different distribution of subfield sizes in the small environment (Small  
 240 1 and Small 2; n = 1152 subfields). (H) % of environment covered per place field. (I) The  
 241 difference between maximum firing rate of each pair of subfields was calculated, |F1-F2|, |F1-F3|,  
 242 |F2-F3|. (J) Distributions of differences in maximum firing rate between subfield pairs from all  
 243 cells are shown for the megaspace (blue, n = 1964 subfield pairs) and small environment (red, n =  
 244 468 subfield pairs). These differences are typically small, which suggests that subfield firing rate  
 245 is not sufficient to differentiate spatial position for multiple subfield place cells. For all panels \*\*\*  
 246 =  $P < 0.0001$ .

247  
 248  
 249

*Place cells exhibited irregular patterns of subfields distribution across the megaspace*



250           The distribution and spatial position of the population of place subfields were consistent  
251 with an ensemble coding scheme of spatial position in which the population discharges at each  
252 location are unique [7]. The population of subfield centers from all place cells was spread out  
253 within the megaspace, with no evidence of clusters or repeated positional patterns (Fig. 4A). There  
254 was a small accumulation of fields near the walls, possibly because walls were ‘cue-rich’, whereas  
255 fields located in the rooms center were ‘cue-poor’ [18]. However, there was only a moderate  
256 positive linear correlation ( $r = 0.36$ ) between subfield size and distance to the closest wall in the  
257 megaspace (Fig. 4B). Interestingly, there was more wall clustering (Fig. 4C) and a stronger  
258 positive linear correlation ( $r = 0.40$ ) between field size and distance to closest wall in the small  
259 environment than in the megaspace (Fig. 4D), despite the more limited range of subfield sizes. We  
260 quantified the percentage of place fields in each environment that contacted the walls, the corners,  
261 and those that did not contact any boundary, “middle cells” (Fig. 4E). In spite of the very different  
262 environmental scales, and characteristics of place cells in the different environment, there were  
263 similar proportions of corner, wall and middle located subfields in the megaspace and small  
264 environment (Fig. 4F). We next investigated the distance between subfields within each cell in the  
265 megaspace. The configurations of individual place fields per cell in the megaspace appeared to be  
266 irregular [12] as evidenced by the fact that they were normally distributed both for average distance  
267 between field centers, (Kolmogorov-Smirnov test;  $D_{(345)} = 0.044$ ,  $P > 0.2$ ; Fig. 4G) and field edges  
268 ( $D_{(345)} = 0.037$ ,  $P > 0.2$ ; Fig. 4H). Randomly generated place field positions in the megaspace (Fig.  
269 4I) also produced a normally distributed pattern of average distances between place fields per cell  
270 ( $D_{(345)} = 0.057$ ,  $P > 0.2$ ), however, slightly offset to the left towards lower average distances (Fig.  
271 4J). The more abundant fields in the corners in the data resulted in more high distance field pairs  
272 compared to the more dispersed simulated field centers.

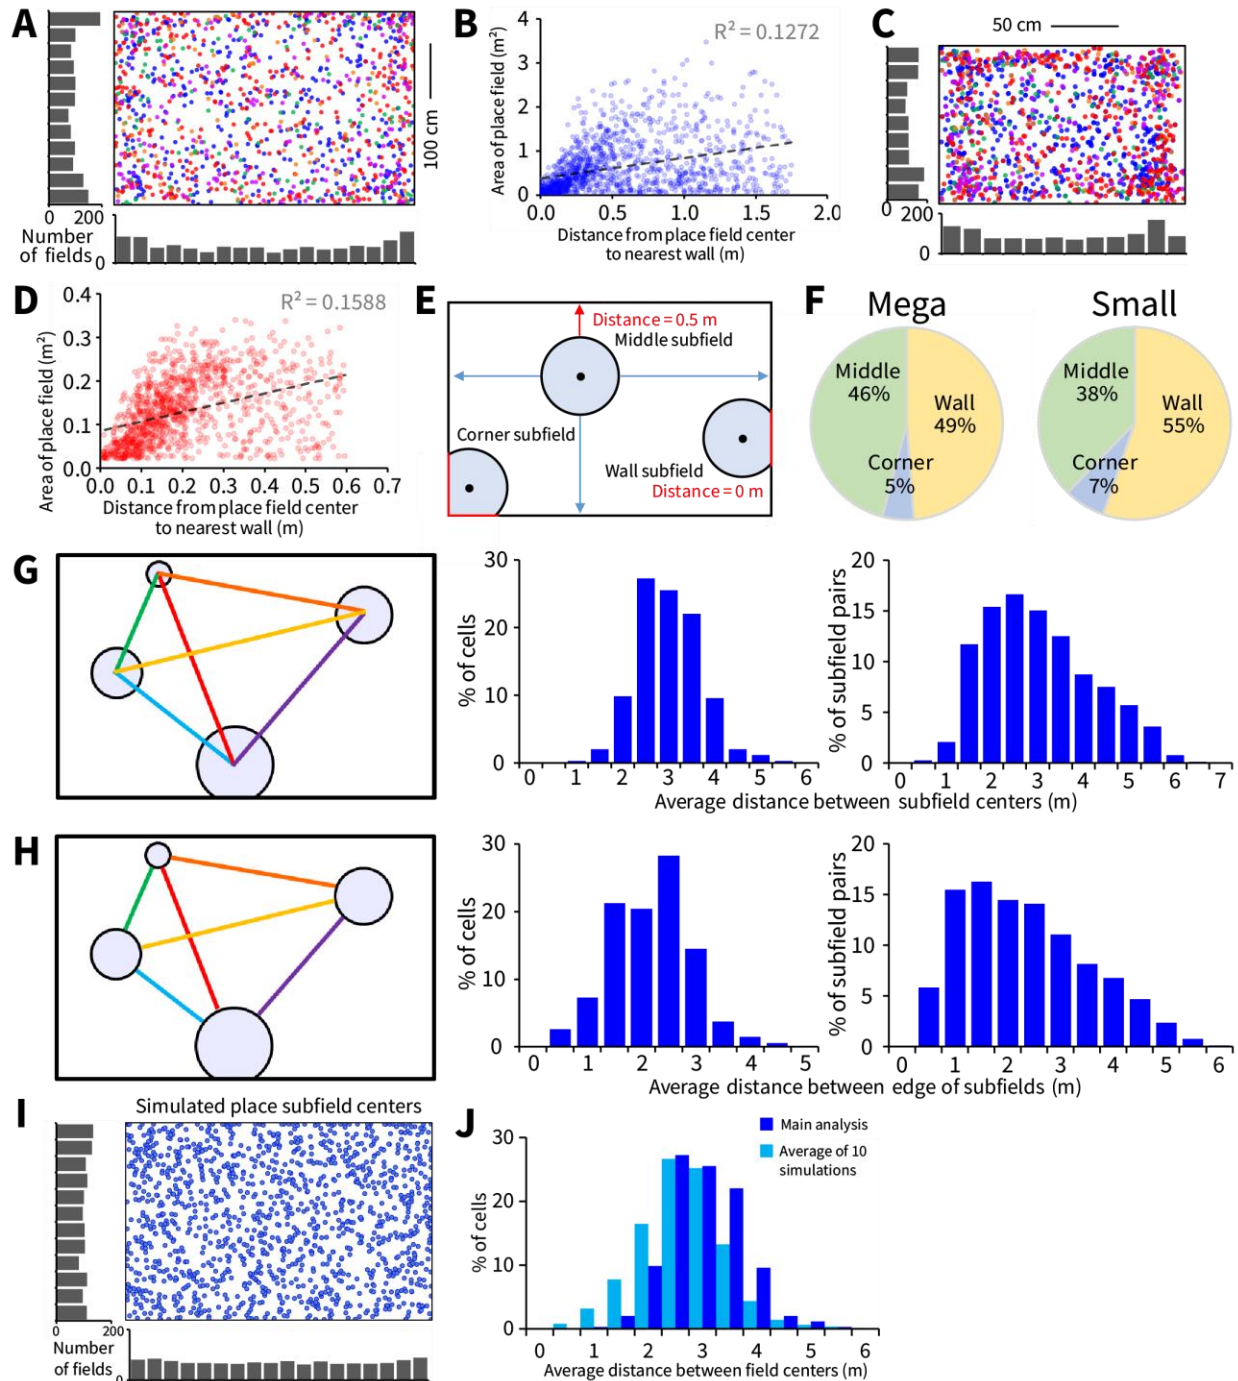

273

274

275

276

277

278

279

280

281

**Fig. 4: A well-isolated sample had comparable place cell characteristics to the population of cells and the distances between place cell subfields were normally distributed.** (A) Plot of all place field centers in the megaspace, colors indicate place fields recorded from 5 different rats (blue, orange, red, green, purple). (B) Distance to the nearest wall plotted against subfield area for all subfields in the megaspace. (C) Plot of all subfield centers in the small environment. (D) Distance to the nearest wall plotted against subfield area for all subfields in the small environment. (E) The distance in each cardinal direction from the edge of each subfield to the maze walls was calculated. The red arrow shows the closest wall. Place subfields that contacted two, one, or no

282 walls were designated “Corner”, “Wall”, and “Middle” subfields, respectively. (F) The megaspace  
283 and small environments had similar proportions of types of subfields. For place cells with at least  
284 2 subfields, (G) the distance from the center of each subfield to the center of every other subfields  
285 (i.e. field pairs) and (H) the distance from the edge of each subfield to the edge of every other  
286 subfields were calculated. The average distance between subfields per place cell for both of these  
287 measures was normally distributed, whereas the distribution of distances between subfield pairs  
288 for both of these measures was right skewed, meaning a larger proportion of field pairs were closer  
289 together relative to the cell-averaged data. (I) Place field positions from the experiment are shown  
290 next to (J) an example of randomly generated positions. The distribution of average distance  
291 between field centers per cell was the same shape as the experimental data, but shifted towards  
292 higher values.

293

294 *Place cell representations were more dynamic in the megaspace than in classic environments*

295

296 We next investigated the stability of the spatial representation in the megaspace after  
297 environment changes. We recorded 125 place cells from additional sessions in which two of the  
298 rats experienced the megaspace (Mega 1), followed by the small environment, followed by the  
299 megaspace (Mega 2) again (Fig. 5A). We compared the stability of place fields between Mega 1  
300 and Mega 2 visits with the stability of fields between Small 1 and Small 2 visits in the main  
301 experiment sessions (Small 1 - Mega - Small 2). This analysis included all place cells defined  
302 from the main experiment sessions ( $n = 539$ ). An independent t-test showed that place cells were  
303 less stable between megaspace visits than between small environment visits ( $t_{(920)} = 8.33$ ,  $P <$   
304  $0.0001$ ; Fig. 5B). However, both populations included place cells that changed in size, position,  
305 and firing rates between environmental visits. This may be related to the large shift in  
306 environmental scale between the small and megaspace environments.

307 We compared place cell characteristics between the three environmental visits using one-  
308 way Anova and found that the number of subfields did not vary between megaspace visits ( $F_{(2,313)}$   
309  $= 90.2$ ,  $P < 0.0001$ ; Tukey’s Mega 1 vs Mega 2,  $P = 0.37$ ; Fig. 5C), and cell-to-cell variation in  
310 subfield numbers was unimodal but not normally distributed (Kolmogorov-Smirnov test;  $D_{(114)} =$   
311  $0.13$ ,  $P < 0.5$ ; Fig. 5D). As expected, there were less subfields in the small environment (Tukey’s,  
312 Mega 1 and Mega 2 vs Small,  $P = 0.0001$ ), which had a comparable distribution of subfield  
313 numbers as small environment visits in the main experiment ( $F_{(1,847)} = 0.79$ ,  $P = 0.37$ ; Fig. 5E and  
314 Fig. 2). The average area ( $F_{(2,313)} = 56.78$ ,  $P < 0.0001$ ; Fig. 5F) and sum area ( $F_{(2,304)} = 864.1$ ,  $P <$   
315  $0.0001$ ; Fig. 5G) of subfields per cell were different between environment visits, which was driven  
316 by differences between the megaspace visits and small environment (Tukey’s,  $P$ ’s  $< 0.0001$ ).  
317 Although the average area of subfields per cell was comparable between Mega 1 and Mega 2 ( $P$   
318  $= 0.97$ ), the sum area of place subfields was larger in Mega 2 than in Mega 1 ( $P < 0.05$ ). However,  
319 the average (Fig. 5H) and maximum (Fig. 5I) firing rates were not different between megaspace  
320 visits (One-way Anova’s, Mega 1 vs Mega 2; Mean rate:  $F_{(1,238)} = 0.12$ ,  $P = 0.73$ ; Max rate:  $F_{(1,238)}$   
321  $= 1.22$ ,  $P = 0.27$ ). These findings suggest that both spatial and non-spatial associations may be  
322 more continuously updated [13] in large environments than in smaller ones. Some of these  
323 differences may also be associated with larger distances to anchoring cues in the megaspace, the  
324 different duration spent in the environments, or different time intervals between re-visits. These  
325 additional sessions also demonstrated that the multi-field place cell phenomenon was not  
326 specifically related to switching from small to subsequently larger environments, which has been  
327 the favored design in other studies [7, 9, 12].

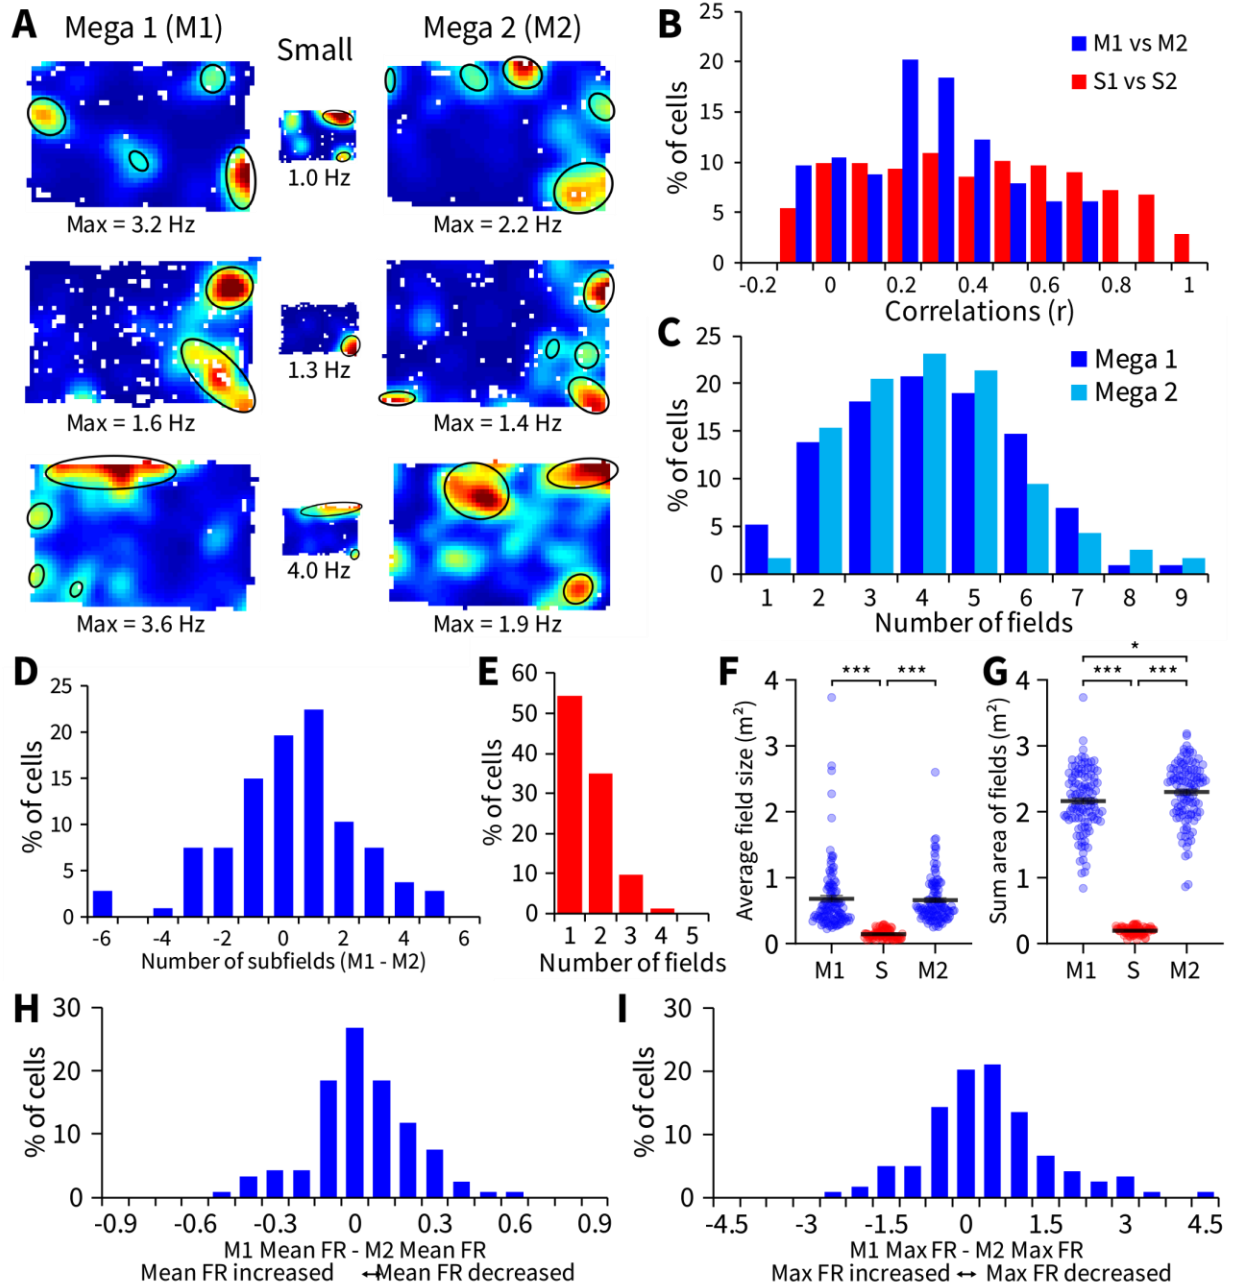

328  
329  
330  
331  
332  
333  
334  
335  
336  
337  
338  
339

**Fig. 5: Place fields are more dynamic across visits in the megaspace than across visits in the small environment.** (A) Representative examples of three place cells recorded in additional sessions in which rats foraged in the megaspace before (Mega 1) and after (Mega 2) the small environment. (B) Comparisons of rate map correlations, between the two megaspace visits (M1 vs M2) and the two small environment visits (S1 vs S2) from the main experiment. (C) The distribution of number of subfields per cell was comparable for the two megaspace visits. (D) Cell-to-cell variation in number of subfields (Mega 1 – Mega 2) between megaspace visits. (E) In the small environment, place cells had a similar distribution of number of subfields as in the main experiment. (F) The average size of subfields per cell was comparable between Mega 1 and Mega 2, however, (G) the sum area of subfields per cell was larger when the megaspace was revisited (Mega 2). Difference in (H) mean firing rate, and (I) maximum firing rate between megaspace

340 visits for the population of cells. Negative values along the x-axis indicate increased firing in Mega  
341 2 relative to Mega 1, whereas positive values indicate decreased firing in Mega 2 relative to Mega  
342 1. All units in Hz. For all panels \* =  $P < 0.05$ , \*\*\* =  $P < 0.0001$ .

343

344 *Place subfield properties are modulated by environmental scale*

345

346 To study how the place cell representation changed with the scale of the environment, we  
347 recorded 130 additional place cells in two rats from sessions in which the environment size  
348 increased in three stages (Fig. 6A). In between navigating in the small environment and the  
349 megaspace, rats experienced a “large” environment which was intermediate in size (350 x 235 cm;  
350 8.2 m<sup>2</sup>). As expected, the sum area of all place subfields increased as the environments expanded  
351 in size (One-way Anova;  $F_{(2,336)} = 1488.37$ ,  $P < 0.0001$ ; Fig. 6B). In contrast, the proportion of the  
352 environment covered by place fields per cell did not increase linearly (Fig. 6C); instead, it was  
353 similar for the two larger environments ( $F_{(2,336)} = 78.6$ ,  $P < 0.0001$ ; Tukey’s, Large vs Mega,  $P =$   
354 0.92). We found that the number of place subfields also increased with the scale of the environment  
355 ( $F_{(2,387)} = 133.22$ ,  $P < 0.0001$ ) with the highest proportion of cells exhibiting 1-2 subfields in the  
356 small environment, 3 subfields in the large environment, and 4-10 subfields in the megaspace (Fig.  
357 6D). Variability in place field size also increased with environmental scale (Fig. 6E), whereas the  
358 ratio between the peak and average firing rate within place fields decreased slightly ( $F_{(2,1128)} =$   
359 9.97,  $P < 0.0001$ ; 6F). The total area covered by a cells subfields was not correlated with the  
360 number of subfields and increased for larger environments (Fig. 6G). We compared the fraction of  
361 the environment covered by place fields for each cell in the small vs large (Fig. 6H), small vs mega  
362 (Fig. 6I), and large vs mega (Fig. 6J) environments, and found the correlations to be low,  
363 suggesting that they were unrelated. Across all recordings from the four different sized  
364 environments used in the study (Fig. 6K), the number of place subfields increased linearly with  
365 environment size ( $R^2 = 0.9776$ ; One-way Anova;  $F_{(3,2152)} = 608.8$ ,  $P < 0.0001$ ; all Tukey post-hoc  
366 comparisons,  $P$ ’s  $< 0.001$ ; Fig. 6L). Similarly, the sum area of all subfields per cell increased  
367 significantly ( $R^2 = 0.9801$ ;  $F_{(3,2152)} = 7774.6$ ,  $P < 0.0001$ ; all Tukey post-hoc comparisons,  $P$ ’s  $<$   
368 0.0001; Fig. 6M) but with a strong exponential fit ( $r = 0.996$ ) which matched the increase in area  
369 between the four environments ( $r = 0.987$ ).

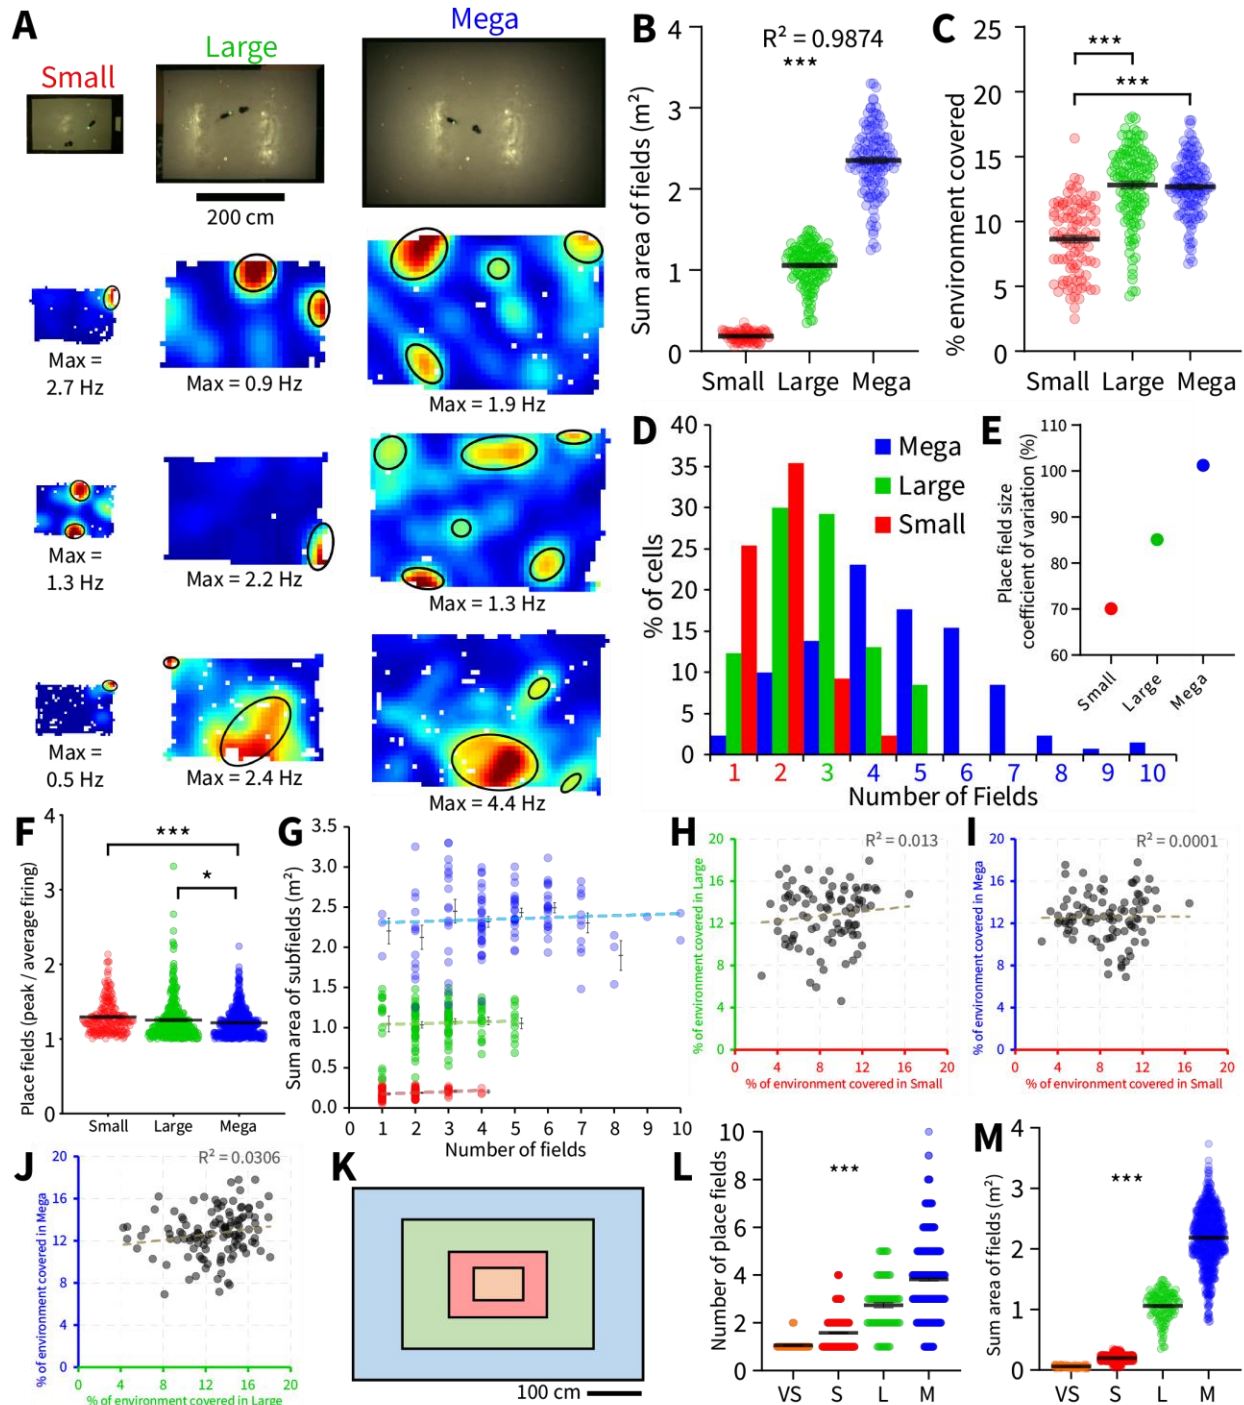

370  
 371 **Fig. 6: Place subfields scale with environment size.** (A) Overhead view of three environments  
 372 and example place cells from additional sessions in which the size of the environment increased  
 373 in three stages. Between visiting the small environment and megaspace, a large environment (3.5  
 374 x 2.35 m) was visited that was intermediate in size. (B) The sum area of all subfields increased  
 375 linearly as environment size expanded, however, (C) the percentage of the environment covered  
 376 by subfields was comparable between the two larger environments. (D) Distribution of number of  
 377 subfields per cell for the three environments. Number of subfields along the x-axis are color-coded  
 378 to indicate which environment had the highest proportion of fields. (E) Variability of place field

379 size increased with environment size. **(F)** The ratio of peak to average firing rate within place fields  
380 was comparable across environment sizes. **(G)** Distribution of sum subfield area for cells with  
381 different numbers of subfields in the megaspace (blue), large (green), and small (red)  
382 environments. The fraction of the environment covered by place fields was uncorrelated between  
383 the **(H)** Small and Large, **(I)** Small and Mega, and **(J)** Large and Mega environments. **(K)** To-scale  
384 depiction of the four environment sizes used in the current study, from smallest to largest: very  
385 small (VS, orange, 0.54m<sup>2</sup>), small (S, red, 2.16m<sup>2</sup>), large (L, green, 8.225m<sup>2</sup>), megaspace (M, blue,  
386 18.55m<sup>2</sup>). Place cell recordings in these environments were aggregated from all session types (VS,  
387 n = 122; S, n = 1278; L, n = 130, M, n = 750). **(L)** As the environment size increased, the number  
388 of place subfields increased linearly and **(M)** sum area of subfields increased exponentially across  
389 the four environment sizes. For all panels \* =  $P < 0.05$ , \*\*\* =  $P < 0.0001$ .

390

## 391 Discussion

392

393 Our results show that the area of the environment covered by each dorsal CA1 place cell  
394 increases with the size of the environment, and that each cell is active in several distributed  
395 subfields of various sizes. The ability to exhibit different subfield sizes gives each place cell the  
396 capability to form a multi-scale representation of space. These multiple subfields also allow each  
397 cell to be active in several sections of the same environment, possibly spatially binding them, and  
398 allows for each location of the environment to be represented by a unique combination of subfields  
399 of different sizes [19]. Ensembles of dorsal CA1 place cells therefore form complex multi-scale  
400 codes capable of supporting concurrent and interdependent coarse- to fine-grained spatial  
401 representations, extending our current understanding of the hippocampal spatial code in large  
402 ethologically realistic environments.

403 The propensity for multiple place fields and up-scaling of field size increased as the  
404 environment size increased; an efficient way for a finite population of place cells to encode vast  
405 natural environments measured in kilometers [20, 21]. Place cells may be intrinsically multi-scale  
406 (multi-field) in all environments, even though only one or two place subfields can be physically  
407 reached by the animal in smaller ‘classic’ environments. An interesting question is how place cells  
408 with multiple spatial subfields can accurately represent the position of an animal? We found no  
409 within-field firing rate pattern that might explain how subfields from the same cell could be  
410 differentiated based on spiking activity. Instead, it is likely that overlaps from many different cell’s  
411 subfields use an ensemble pattern decoding scheme that can accurately estimate the animal’s  
412 current location [7, 12, 22]. Multiple subfields allow a cell to contribute to the ensemble in multiple  
413 regions of the environment at multiple scales. This raises the interesting possibility that in large  
414 environments, place cells may contribute to the spatial ‘binding’ of different subareas within the  
415 same environment, contributing to the animal understanding of the space as being the ‘same  
416 space’, whether it is physically located in one side of the room or in another [23]. The multiscale  
417 nature of the code also raises questions about the interactions of these CA1 cells with other types  
418 of cells known to be theoretically useful to spatial navigation, such as head direction cells,  
419 boundary vector cells [24] or landmark-vector cells [25].

420 Our work supports the findings of others showing that place cells exhibit multiple  
421 irregularly-arranged place fields in a large open environment [7, 12]. However, here we show a  
422 greater enlargement of place fields than would have been predicted and that in even larger  
423 environments, place subfields also greatly range in size, forming a representation at multiple  
424 spatial scales. Rich et al. showed multi-field place cells when rats traversed a winding 48m-long

425 linear track [9], but did not report a multi-scale representation. Although the animals travelled a  
426 considerable linear distance when the track was fully extended, the total floorspace available to  
427 the animal was more than four times smaller than that of the megaspace. Furthermore, as cells  
428 were only recorded during one novel exposure session, direct comparison between the studies is  
429 difficult. It is likely that the encoding of novel environments is significantly different to that of a  
430 familiar one, at least in the requirement for the latter to retrieve and process memories. Rich et al.  
431 concluded, similarly to previous studies, that dorsal multi-field place cells may operate alongside  
432 a dedicated ventral hippocampal place cell population in order to encode differently sized  
433 environments.

434 Alongside others, we have also previously suggested a multi-scale representation of large-  
435 scale space involving the longitudinal axis of the hippocampus in which fine- and coarse-grained  
436 representations are supplied by the dorsal and ventral hippocampus, respectively [21]. However,  
437 considering the structural, connective, and functional gradients present along the dorsoventral  
438 hippocampus [26], it is likely that representations of different scales are in fact integrated along  
439 the entire hippocampus. Our results suggest this is indeed the case within the dorsal CA1. In  
440 correspondence to the manner in which single-field place cells increase in size along the dorsal-  
441 to-ventral hippocampal axis [1], we predict that the total area of the environment covered by multi-  
442 field place cells would also increase along the axis. Within large environments, the majority of  
443 ventral place subfields would be larger, but smaller place fields would also be exhibited, which  
444 could explain in part previous reports of smaller ventral place fields [27]. The concept of a dorsal-  
445 ventral functional gradient of small-to-large scale representations is challenged by our finding that  
446 individual multi-field cells within dorsal CA1 can exhibit a wide range of subfield sizes. Instead  
447 we propose that the multi scale coding is pervasive throughout the axis, and that place fields at all  
448 levels may be directly connected through the dense web of CA3 connections present along the  
449 longitudinal axis [21]. Large place fields at all levels may form distinct neural ensembles dedicated  
450 to encoding a lower-resolution and less computationally intensive representation supporting coarse  
451 travel. Simultaneously, longitudinal neural ensembles utilizing smaller place fields from these  
452 same cell populations are overlaid to provide higher resolution and details where needed within  
453 the environment [20]. Information selectively received by ventral levels (e.g. amygdala or  
454 prefrontal cortices) would then modulate all levels of the longitudinal axis simultaneously, at  
455 multiple scales. There is already evidence in human fMRI studies of fine- and coarse-grained  
456 hippocampal representations [28-30]. Interestingly, reliance on cognitive maps, and better  
457 navigational performance are related to greater posterior (dorsal), relative to anterior (ventral),  
458 hippocampal volume [31-33]. Other virtual navigation studies found that the anterior hippocampus  
459 became mainly involved when navigating through large and complex environments, whereas the  
460 posterior hippocampus was always active [28, 30]. Certainly, humans must make use of complex  
461 place cell maps utilizing three dimensions [34], over many overlapping spatial scales, from single  
462 rooms, to buildings, to streets, to cities, and beyond. It would be interesting to incorporate the  
463 concept of multi-scale place cells into models of how these hippocampal cells support networks of  
464 semantic cognitive space [35]. The idea of multi-scale overlapping place subfield ensembles may  
465 also be suited to understanding how mnemonic hierarchies may be encoded in autobiographical  
466 memory [16]. For example, memory of a life-event may constitute overlapping ensembles that  
467 encode both contextual (large subfields) and detailed (small subfields) features of the memory.

468 The increased navigational complexity inherent to the megaspace representation, which  
469 incorporates multiple subfields per cell and a wide range of subfield sizes, may require more  
470 flexibility and adaptive capability than previously thought when studying behavior in smaller



471 environments. Our results suggest that place cell characteristics were more dynamic upon  
472 revisiting the megaspace compared to when revisiting the small environments, however this would  
473 need to be studied more directly, ideally with a second different megaspace room. The irregular  
474 patterns of place subfields observed in the current study suggests a flexible representation  
475 consisting of unique ensemble discharges of overlapping fields at any one location, rather than an  
476 orderly partitioning in which each region contains a field from each cell [7, 13].

477 Taken together, our findings reveal new coding properties and point to new ways in which  
478 place cells may operate in larger-scale navigational space and will require new generations of  
479 computational models of multiscale spatial navigation [13] and new experimental paradigms to be  
480 developed.

481  
482 **Acknowledgements:** This research is supported by: NSF CRCNS #1429937 and NSF IIS  
483 #1703340. We thank S. Gianelli and S. V. Srivathsa for technical assistance. We thank Dr. Bruce  
484 McNaughton and Dr. Andre Fenton for their constructive comments on previous versions of the  
485 manuscript.

486  
487 **Author Contributions:** B.H. and J.M.F. conceived and planned the experiments. B.H. performed  
488 the surgeries and collected the electrophysiological data with assistance from M.C. and M.S. B.H.,  
489 J.M.F, and M.C. contributed to the interpretation of the results. B.H. led the analysis and writing  
490 the manuscript. All authors discussed the results and commented on the manuscript.

491  
492 **Declaration of Interests:** The authors declare no competing interests.

493  
494

## 495 **Methods**

496  
497 All methods were approved by the University of Arizona IACUC and followed NIH guidelines.

498  
499 **Subjects and behavioral apparatus.** Five adult male Brown Norway Rats (6-7 months and 321-  
500 346 g at time of surgery) on a reverse 12/12 cycle were used in this study. Rats were trained to  
501 forage and follow a small robot (Fig. 1C) in a very large environment (530 x 350 cm). This  
502 ‘megaspace’ [36] was enclosed by black wooden walls (51 cm high). Large colorful national flags  
503 (71 x 56 cm) covered the east, west, and south room walls at varying heights, and irregular  
504 distances from each other. Smaller flags (~ 25 x 15 cm), cut into different shapes, were placed  
505 along all four maze walls at varying heights. All flags had different unique combinations of shapes  
506 and included light and dark colors. The floor of the room was painted with granular water-proof  
507 paint and contained multiple ‘cues’ in the form of small pieces of electrical tape of varying size  
508 and shape (~ 1–4 cm). See Fig. 1A for a top-down view of the megaspace. Flags and floor cues  
509 were chosen to provide a richly cued environment and were never displaced.

510 Three smaller environments were also used, consisting of modular walls centered within  
511 the megaspace, and sharing the same floorspace; these were designated as the ‘large’, ‘small’, and  
512 ‘very small’ environments. The large environment (350 x 235 cm) had 20 cm high wooden walls  
513 consisting of 3 segments per long side, and 2 segments per shorter side. Three different colors of  
514 segments were arranged so that the same color was never used for 3 adjacent segments, and that  
515 no corner or wall was the same. Some of the megaspace maze-wall flags, and all of the room-wall  
516 flags were visible from within the large environment. The small environment (180 x 120 cm)

517 consisted of 33 cm high black wooden walls along three sides (north, east, and west) and a 51cm  
518 high black wall along the south side. A single white rectangular cue-card (21.6 cm high and 28 cm  
519 tall) was centered on the taller south wall. Only the larger flags positioned higher up on the room  
520 walls were visible to rats inside the small environment. The very small environment (90 x 60 cm)  
521 had black wooden walls 43 cm high with a white cue card (21.6cm high and 28cm tall) and an X  
522 painted in white paint opposite each other on the shorter walls. Maze and room wall flags were not  
523 visible from inside the very small environment.

524 The rat's movements in the megaspace and large environment were captured by an  
525 overhead camera (PointGreyFlea3 at 25-30 frames per seconds) mounted on the ceiling in the  
526 center of the room. A separate overhead camera (Logitech Carl Zeiss Tessar Webcam HD 1080p,  
527 25-30 fps) was used to capture the rat's movement in the small and very small environments. The  
528 cameras provided inputs to our tracking software ZTracker, written in house in LabVIEW  
529 (National Instruments), and freely available from our website. A strip of LEDs near the cameras  
530 provided about 0.5-0.6 lux of light during the experiments.

531  
532 **Sphero robot.** The small robot used in the study was a Sphero 2.0 (Sphero, Boulder, CO) which  
533 was always fitted within a black plastic cart (Fig. 1C). A small black plastic weigh boat, containing  
534 mash (4:3 rat chow:water) was glued at the back of the cart. Sphero was linked via Bluetooth to  
535 custom in-house LabVIEW (National Instruments) software allowing the robot to be piloted with  
536 a joystick (Microsoft Sidewinder USB Joystick) enabling fine control of speed and trajectory. See  
537 [17] for more detailed information about Sphero, its control system, and integration with rat  
538 behavior. All control software to pilot the robot is available for download from our laboratory  
539 website. In the very small environment only, a smaller 'mini-Sphero' (Sphero, Boulder, CO; 4cm  
540 diameter) housed in a homemade 3D-printed cart was deployed to enable maneuvering in such  
541 restricted space (Fig. S4G). The homemade cart was 9.2 cm long, 5 cm high, and 5 cm at the widest  
542 point (the wheels). A small section of weigh boat was attached to the back of the cart creating a  
543 small dish in which mash (wet regular food) was placed, as with the regular-sized Sphero.

544  
545 **Pre-Training.** Rats were kept at 85-90 % of ad-libitum body weight and were fed after each  
546 training or recording session. Water was always available. After habituation to the environment in  
547 the home-cage for several days, rats were trained to sit on a towel-covered raised bucket lid (34.5  
548 cm diameter, 83 cm high) in the center of the room for periods up to 1 hr. Next, as described  
549 previously [17], rats were trained to follow the Sphero robot while being habituated to the  
550 megaspace over several weeks. After two or three 10 – 15 min sessions following the robot in the  
551 megaspace and one session foraging in the small environment, the rats were put back on ad-libitum  
552 food in preparation for Hyperdrive implantation.

553  
554 **General procedure.** After surgical recovery (see below), rats were re-introduced to the various  
555 environments over the course of about a week. As the animals became more accustomed to the  
556 additional weight of the hyper-drive, small weights (9-32g) were slowly added to the drive's  
557 protective cap to simulate the weight of the wireless headstage and build up the neck muscles.  
558 Elastic support, attached to the wireless headstage, was also used during training, mounted to the  
559 ceiling for the small environment, and attached to a long flexible pole held by an experimenter for  
560 the megaspace.

561 Each recording session began with a 10-20 min pre-rest period on the bucket, followed by  
562 three behavioural segments (visits to different environments; see 'Session types'), followed by a

563 10-30 min post-rest period on the bucket. Within each session, the behavior in all three segments  
564 was either classical foraging or following the robot. In Sphero-following sessions, the robot was  
565 driven in front of the rat, maintaining a distance of ~ 15–25 cm, in a combination of straight and  
566 curving arcs around the environment (see Movie S1, and Fig. S1A-C and S3, for examples of the  
567 rat's overhead path). The cumulative coverage of the room was monitored in real-time by the  
568 experimenter from the camera tracker. When the rat caught up with the robot it would slow or stop  
569 to allow the rat to consume food, if the robot was not caught, it would slow or stop after ~ 2-4  
570 mins. When the weigh boat became empty, the robot was kept moving and interacting with the rat  
571 until the rat became unresponsive / disinterested or ~ 1 min had passed since the rat had fed, at  
572 which time the experimenter directed the robot to the edge of the maze, and re-baited the cart. In  
573 instances when the rat did not immediately follow the robot, simulated darting behavior [37] was  
574 used, eventually resulting in the rat following the robot. In classical foraging sessions, small 20  
575 mg food pellets (TestDiet; Richmond, IN, USA) were tossed into the arena, and the rat was left to  
576 forage for the duration of each segment.

577 Cumulative tracking of the rat's path was used to guide the animal to areas of the  
578 environment not covered sufficiently and influenced the length of each segment; longer segments  
579 were recorded if more coverage was needed. During the rest periods at the start and end of each  
580 session, the rat was placed on the bucket near the center of the room (center of both the small  
581 environment and megaspace). Between segments, the rat was placed on the bucket for 5-7 mins  
582 off to the side of the room while environments were erected / dismantled. The wireless head-stage  
583 was turned off during this time to allow it to cool down, and the battery was replaced if necessary.  
584 However, the headstage always remained connected for the duration of each daily session.

585  
586 **Session types.** In the main experimental sessions (Small 1-Mega-Small 2: S-M-S; n = 54 sessions),  
587 rats visited the small environment (8 – 10 mins), followed by the megaspace (35 – 55 mins),  
588 followed by the small environment again. These sessions compared place cell firing properties in  
589 the small and megaspace environments. In two of the rats, additional session-types were run. In  
590 eight sessions (7 Sphero-following, and 1 foraging), rats visited the megaspace, followed by the  
591 small environment, followed by the megaspace again (M-S-M). These sessions investigated the  
592 stability of place cell firing in the megaspace over several visits during the same session (Fig. 5A).  
593 In eight sessions (7 Sphero-following, and 1 foraging), rats visited the small environment, followed  
594 by the large environment for 25 mins, followed by the megaspace (S-L-M). These sessions  
595 investigated changes in place cell characteristics over three environments of increasing scales (Fig.  
596 6A). In ten Sphero-following sessions, rats visited the small environment for all three behavioral  
597 segments (S-S-S). These sessions were used as control sessions for comparison with correlations  
598 performed between the small and megaspace revisits in other sessions (Fig. S4B). In three Sphero-  
599 following sessions, rats visited the very small environment (5 – 6 mins), followed by the small  
600 environment, followed by the very small environment again (V-S-V). These sessions established  
601 place cell characteristics in a constrained environment, traditionally used for recording place cells  
602 (< 1m<sup>2</sup>; Fig. S4F).

603  
604 **Surgery and recording techniques.** After completion of pre-training, rats were anesthetized using  
605 2–3% isoflurane in oxygen, placed in a stereotaxic frame, and implanted with a Hyperdrive [17,  
606 38] aimed at the right dorsal CA1 hippocampal cell body layer (–4.75 mm posterior, 4.0 mm lateral  
607 to bregma, 10° angle away from midline). The drive was anchored to the skull with seven anchor  
608 screws and dental acrylic, and two of these screws were used as animal grounds. Additionally, two

609 EEG electrodes (Teflon-insulated stainless-steel wire, 0.0045 in.) were implanted in the right  
610 medial prefrontal cortex (+3.00mm posterior, 1.2 mm lateral to bregma, 2.8 mm depth, 9° angle  
611 towards midline). An EMG electrode was implanted in the neck muscles of the rat to help assess  
612 sleep during the rest phases (data not shown). All implantation coordinates were modified  
613 proportionally to the Bregma-to-Lambda distance of the animal using a brain atlas [39].  
614 Glycopyrolate (I.M.) was administered during the surgery to alleviate congestion, and Carprofen,  
615 an analgesic, was given (I.P.) during surgery and again the day after.

616 The Hyperdrive contained 14 independently movable tetrodes, two of which were used as  
617 reference. Tetrodes were constructed from four strands of insulated wire (12  $\mu$ m diameter nickel-  
618 chrome wire), gold-plated to reduce wire impedance to 0.5 M $\Omega$  (at 1 kHz). Following surgery,  
619 about 4-6 tetrodes at a time were slowly lowered in batches toward the hippocampal dorsal CA1  
620 pyramidal cell body layer both to facilitate recordings over several months and to avoid instability.  
621 Reference tetrodes were left in an electrically quiet zone in the cortex or corpus callosum. Tetrodes  
622 were spaced ~50 $\mu$ m apart, and lowered at the end of each experimental session, to ensure that the  
623 same cells were not recorded in multiple sessions.

624 Electrophysiological recordings were made using either a wireless Cube 64 or Cube 2  
625 headstage (currently renamed 'Freelynx', Fig. 1C shows the Cube 2 headstage mounted on the  
626 hyperdrive of a moving rat) controlled by a Digital Lynx SX system (Neuralynx, Bozeman, MT).  
627 Single-unit data was amplified, filtered (600–8000 Hz), and digitized at a rate of 30 kHz. Local  
628 field potential was recorded from one channel per tetrode, filtered between 0.5 – 450 Hz, digitized  
629 at 2 kHz, and used to detect the presence of sharp wave ripple oscillations, confirming that tetrodes  
630 were in the dorsal CA1 cell body layer. Two LEDs (red/green) mounted on the headstage were  
631 used to track the animal's movements with the overhead cameras.

632  
633 **Spike sorting.** Action potentials were sorted offline using Spike2 software (CED, Cambridge UK)  
634 and further analyzed using custom Matlab code. Clustering was performed manually by a single  
635 experimenter in three-dimensional projections based on the principal components of the waveform  
636 amplitude. Data from each session – the three behavioral segments and two rest periods – were  
637 spike-sorted together. Only well isolated clusters with pyramidal waveforms, signal-to-noise ratio  
638 of at least 4 on one of the 4 channels were retained. Signal was measured as the mean amplitude  
639 of the action potential (peak-to-trough), and noise was measured as the mean amplitude of the  
640 initial 2 points of each waveform. Clusters isolated from the same tetrode were manually checked  
641 to insure each had a sufficiently different configuration of shape/amplitudes across the four  
642 channels. Clusters were labelled as either putative excitatory cells or putative interneurons using  
643 differences in spike width, average firing rate and complex-spike bursting.

644  
645 **Detecting behavioral stops and sharp wave ripples (SWR).** Position data, based on tracking of  
646 the LEDs on the head stage, were analyzed and all stop periods were detected. Stops were  
647 designated as periods when instantaneous velocity dropped below 6 cm/sec for a period of at least  
648 0.5 sec. SWR events were detected using the best two LFP channels per session which were band  
649 pass filtered between 100-250 Hz and SWR envelopes calculated using a Hilbert transform,  
650 smoothed with a Gaussian kernel (3ms standard deviation). During behavioral segments, SWR  
651 events were detected as times within stop periods when the smoothed envelope exceeded 4  
652 standard deviations above the mean for at least 20 ms. For rest segments, SWR events were  
653 smoothed envelopes exceeding 2 standard deviations above the mean for at least 20 ms during stop  
654 periods only. SWR events included 10 ms before and after the envelope, and envelopes exceeding

655 11 standard deviations above the mean were rejected as artifacts. All spikes occurring during sharp  
656 wave ripples were removed when generating spatial-firing rate maps to avoid any SWR activity  
657 contamination [40].

658  
659 **Ratemaps and place fields.** The position data for each session was sorted into bins of 12 x 12  
660 camera pixels (5 x 5 cm for the small and very small environments, 10 x 10 cm bins for the  
661 megaspace and large) with a velocity threshold of 10 cm /sec [41]. Spike-count and occupancy  
662 maps were computed for each cell by counting the number of spikes occurring in each spatial bin,  
663 and the time spent in each spatial bin, respectively. Spike-count bins containing only one spike  
664 and occupancy bins visited for less than 0.08 secs, were considered empty. Both maps were  
665 smoothed using a square Hanning kernel window and the final place field map was produced by  
666 dividing the smoothed spike-count by the smoothed occupancy. The peak firing bin for each cell  
667 was used to colour code the spatial-firing rate map from dark red (highest firing) to dark blue  
668 (lowest firing).

669 The spatial information content (bits/spike) of spatial-firing ratemaps was calculated [42].  
670 The occupancy map was used to quantify the spatial coverage (% Occupied bins) quality of each  
671 behavioural segment in each session by calculating the percentage of filled occupancy bins.

672 Cells were classified as ‘place cells’ only if: (i) mean firing rate was  $>0.1$  Hz but  $<5$  Hz,  
673 (ii) spatial information content  $>0.5$  in at least one recorded environment [43, 44], (iii) they  
674 possessed pyramidal waveforms, which were manually checked in all cells, with (iv) signal-to-  
675 noise  $>4$  on at least one tetrode channel.

676 Place fields were then designated as disconnected rate map regions of high activity  $> 200$   
677  $\text{cm}^2$ , with firing rate threshold  $>1.2$  standard deviations above the mean firing rate in all bins using  
678 the *regionprops()* function in Matlab (Mathworks). The centroid pixel coordinates (x,y), and area  
679 ( $\text{cm}^2$ ) of this region were used to plot an ellipsoid fitted around the edges of each field to aid with  
680 visualisation of the place fields. The highest firing rate bin was designated as the maximum firing  
681 rate for each subfield. For each place cell with at least 2 place subfields, the absolute difference in  
682 maximum firing rate between each possible pair of subfields was determined (Fig. 3I).

683 For the S-M-S and S-S-S sessions, only place cells with correlated firing-rate maps  
684 between the two smaller environments were retained for analysis. Pearson correlations were  
685 calculated between the small environment rate maps recorded before (Small 1) and after (Small 2)  
686 exposure to the megaspace. This correlation was used to calculate a z-score by comparing it to  
687 correlations generated from 300 shuffled versions of each rate map in which the bins were spatially  
688 shuffled randomly. Eligible place cells had to have a z-score greater than 2.5, placing them above  
689 the 99.5% percentile cutoff of the shuffled distribution. For the other session types (M-S-M, S-L-  
690 M, V-S-V), cells that were not active ( $<0.1$  Hz) in some of the environments but were otherwise  
691 eligible as place cells, were included in the analyses.

692 Distance between pairs of fields (in the same environment) was calculated both as the  
693 Euclidean distance between the centroids of each field, as well as the distance between the edges  
694 of each field, by subtracting the radius of each ‘idealised’ (circular) field from the first measure  
695 (Fig. 4G, H). Similarly, distance of each field to the closest wall was the shortest straight-line  
696 cardinal distance (x and y) from the centroid to each of the four walls, with and without the addition  
697 of the field’s radius. Using these measurements, fields were designated as ‘wall fields’ if the fields  
698 edge contacted the wall (distance  $=<$  radius) in one direction, ‘corner fields’ if contacting the wall  
699 in two directions, and ‘middle fields’ if they did not contact the wall (Fig. 4E).

700

701 **Rate map correlations and shuffles.** Additional correlations were computed for each type of  
702 session to compare rate maps in the different sized environments. In each session, tracking data  
703 from all behavioral segments were re-sized to the same dimensions of data recorded in the smallest  
704 environment employed during that session (Fig. S4A). Resized rate maps were generated in the  
705 same way as the small environment rate maps and then compared using Pearson correlations and  
706 z-score comparisons against shuffled maps (300 shuffles).

707 In the main experimental sessions (S-M-S), comparisons were also made between small  
708 environment rate maps and the cell activity in the larger environments restricted to the same floor  
709 space only (Fig. S4D). This was achieved by re-scaling the megaspace tracking data to the pixel/cm  
710 scale of the small environment (0.46 cm / pixel) and generating new cropped rate maps  
711 encompassing cell spiking and occupancy only in the megaspace floor space occupied by the small  
712 environment (shown by yellow dotted line in Fig. 1A). These were compared with Small 1 and  
713 Small 2 ratemaps via Pearson correlations and z-score comparisons against shuffled maps (300  
714 shuffles).

715  
716 **Well-isolated place cell population.** The well-isolated population subsample of 125 place cells  
717 from the main analysis included only 1 cell from each active tetrode per session (isolated cells  
718 with highest signal-to-noise ratio). This was done to eliminate any potential spike-cutting error.  
719 The sample population included contributions of cells from Sphero and foraging sessions, and  
720 from each animal, that matched the proportion of cells contributed by each to the total population  
721 of 383 cells, except for one rat that had only 2 foraging sessions with high cell yields, which  
722 contributed 3 additional Sphero sessions instead of foraging sessions. This well-isolated sub-  
723 population was compared to the main analysis population to ensure that findings in the megaspace  
724 were not due to multiple cells being clustered together.

725 The well-isolated subsample was also used to visualize a population of place fields in the  
726 three environments by plotting each place field's center and area as semi-transparent 'idealized'  
727 circles of the same area as each place field (Fig. 3A). The 532 place subfields exhibited in the  
728 megaspace were split into seven even ranges based on their area, which were color-coded from  
729 purple for smallest to red for largest. These color-coded size ranges were then applied to the 219  
730 subfields in Small 1 and the 209 subfields in Small 2. The area ranges for the color coding was:  
731 Purple <0.092m<sup>2</sup>; Dark Blue: <0.21m<sup>2</sup>; Light Blue <0.366m<sup>2</sup>; Green <0.54m<sup>2</sup>; Yellow <0.81m<sup>2</sup>;  
732 Orange <1.22m<sup>2</sup>; Red <3.47m<sup>2</sup>. When the entire population was plotted, it became graphically  
733 difficult to distinguish individual fields, however the field centers from all cells are shown for the  
734 megaspace (Fig. 4A) and small environment (Fig. 4C) color-coded by animal.

735  
736 **Ensemble place field overlapping:** We plotted the well-isolated subsample population of  
737 subfields from the main experiment as borderless circular fields with an alpha level of 0.05 in order  
738 to quantify the amount of overlaps between place fields (Fig. 3C). This provided a measure similar  
739 to % of environment covered by place fields, but also took into account the density of place fields  
740 at every pixel location throughout the different environments. The image was inverted and pixel  
741 density was analysed using Image J (NIH). To help identify the pixel intensities relating to specific  
742 number of subfield overlaps, a test figure was generated in which 60 overlapping place subfields  
743 with the same alpha level, of diminishing size, were plotted at the same location. Analysis of the  
744 test figure produced 60 peak intensities corresponding to the levels of overlap ranging from  
745 intensity values of 13, for one overlap, to 245 for 60 overlaps, along the 255-pixel intensity scale.  
746 Pixel intensity counts from the data were binned evenly around these peak values for small

747 environment and megaspace subfield plots, which included peak intensities that matched the test  
748 figure. For the subsample population, the distribution of overlaps in Small 1 and Small 2 was  
749 comparable ( $F_{(1,197)} = 1.31$ ,  $P = 0.72$ ), so were averaged and compared directly to the megaspace  
750 overlaps.

751  
752 **Histology and tetrode placement.** The correct position of the electrode tips were confirmed in all  
753 animals by small electrolytic lesions on each of the tetrode wires (30  $\mu$ A, 8-s positive to electrode,  
754 negative to ground) both the day before and just prior to the perfusion. Animals were then deeply  
755 anesthetized with a Ketamine/Xylazine mixture (0.45 and 0.05 mg/kg respectively) and  
756 transcardially perfused through the left ventricle with a Heparin-saline flush (200 ml) followed by  
757 250 ml of cold 4% paraformaldehyde in 0.1M phosphate buffer (pH 7.4). After the brain was  
758 removed, it was post-fixed in the same fixative for 1 day and then transferred to a solution of 30%  
759 sucrose in PBS (phosphate buffer 0.01 M, NaCl 0.9%) with 0.02% sodium azide. At a later date,  
760 brains were then blocked in the coronal plane and immediately cut with a Cryostat (Leica) set for  
761 a thickness of 30-50  $\mu$ m. Every section was obtained from the region of the EEG electrode track  
762 in the medial prefrontal cortex (data not shown), and the region encompassing the hyperdrive  
763 bundle in the hippocampus, and stained with cresyl violet (Nissl) then mounted on slides and  
764 cover-slipped [38].

765 Each tetrodes intersection with the hippocampal dorsal CA1 was recorded on digital  
766 photomicrographs (Stereo Microscope, 10x magnification) by comparing tetrode traces and  
767 electrolytic lesions on successive sections (Fig. S2 shows tetrode positions in dorsal CA1 for all  
768 rats). Each set of coronal photomicrographs was compared to brain atlas plates [39] to estimate the  
769 anterior / posterior position within the dorsal hippocampus.

770  
771 **Data Analysis.** Analysis of place field characteristics between environments and comparison of  
772 cells recorded during robot-following and foraging sessions were done using ANOVA with an  
773 alpha level of  $P < 0.05$ . Tukey's post-hoc tests were used to test for group differences, where  
774 applicable. Kolmogorov-Smirnov tests were used to test normality of frequency distributions.  
775 Correlation coefficient ( $r$ ) and coefficient of determination ( $r^2$ ) were used to measure the statistical  
776 relationship between variables and to determine best fits. Comparison of the degree of subfield  
777 overlap between environments used an ANOVA in which each level of overlap was weighted by  
778 the fraction of environment covered. Distributions of place cell ratemap correlations between  
779 environment re-visits (i.e. Small 1 vs Small 2 or Mega 1 vs Mega 2) were compared using  
780 independent t-tests. All statistical test were performed in SPSS.

781  
782 **References:**

- 783  
784 1. Jung, M.W., Wiener, S.I., and McNaughton, B.L. (1994). Comparison of spatial firing  
785 characteristics of units in dorsal and ventral hippocampus of the rat. *J Neurosci* 14, 7347-  
786 7356.  
787 2. O'Keefe, J., and Burgess, N. (1996). Geometric determinants of the place fields of  
788 hippocampal neurons. *Nature* 381, 425-428.  
789 3. O'Keefe, J., and Dostrovsky, J. (1971). The hippocampus as a spatial map. Preliminary  
790 evidence from unit activity in the freely-moving rat. *Brain Res* 34, 171-175.  
791 4. Muller, R.U., and Kubie, J.L. (1987). The effects of changes in the environment on the  
792 spatial firing of hippocampal complex-spike cells. *J Neurosci* 7, 1951-1968.

- 793 5. Kjelstrup, K.B., Solstad, T., Brun, V.H., Hafting, T., Leutgeb, S., Witter, M.P., Moser, E.I.,  
794 and Moser, M.B. (2008). Finite scale of spatial representation in the hippocampus. *Science*  
795 *321*, 140-143.
- 796 6. Jeffery, K.J. (2011). Place cells, grid cells, attractors, and remapping. *Neural Plast* *2011*,  
797 182602.
- 798 7. Park, E., Dvorak, D., and Fenton, A.A. (2011). Ensemble place codes in hippocampus:  
799 CA1, CA3, and dentate gyrus place cells have multiple place fields in large environments.  
800 *PloS one* *6*, e22349.
- 801 8. Davidson, T.J., Kloosterman, F., and Wilson, M.A. (2009). Hippocampal replay of  
802 extended experience. *Neuron* *63*, 497-507.
- 803 9. Rich, P.D., Liaw, H.P., and Lee, A.K. (2014). Place cells. Large environments reveal the  
804 statistical structure governing hippocampal representations. *Science (New York, N.Y.)*  
805 *345*, 814-817.
- 806 10. Eliav, T., Maimon, S.R., Las, L., and Ulanovsky, N. (2019). Representation of large-scale  
807 spaces in the hippocampus of flying bats. In *Society for Neuroscience*.
- 808 11. McNaughton, B.L., Barnes, C.A., and O'Keefe, J. (1983). The contributions of position,  
809 direction, and velocity to single unit activity in the hippocampus of freely-moving rats. *Exp*  
810 *Brain Res* *52*, 41-49.
- 811 12. Fenton, A.A., Kao, H.Y., Neymotin, S.A., Olypher, A., Vayntrub, Y., Lytton, W.W., and  
812 Ludvig, N. (2008). Unmasking the CA1 ensemble place code by exposures to small and  
813 large environments: more place cells and multiple, irregularly arranged, and expanded  
814 place fields in the larger space. *J Neurosci* *28*, 11250-11262.
- 815 13. Hedrick, K.R., and Zhang, K. (2016). Megamap: flexible representation of a large space  
816 embedded with nonspatial information by a hippocampal attractor network. *J Neurophysiol*  
817 *116*, 868-891.
- 818 14. Grilli, M.D., Wank, A.W., and Verfaellie, M. (2017). The life stories of adults with  
819 amnesia: Insights into the contribution of the medial temporal lobes to the organization of  
820 autobiographical memory. *Neuropsychologia*, in press.
- 821 15. Moscovitch, M., Cabeza, R., Winocur, G., and Nadel, L. (2016). Episodic Memory and  
822 Beyond: The Hippocampus and Neocortex in Transformation. *Annual review of*  
823 *psychology* *67*, 105-134.
- 824 16. Thomsen, D.K. (2015). Autobiographical Periods: A Review and Central Components of  
825 a Theory. *Rev Gen Psychol* *19*, 294-310.
- 826 17. Gianelli, S., Harland, B., and Fellous, J.M. (2018). A new rat-compatible robotic  
827 framework for spatial navigation behavioral experiments. *Journal of neuroscience methods*  
828 *294*, 40-50.
- 829 18. Battaglia, F.P., Sutherland, G.R., and McNaughton, B.L. (2004). Local sensory cues and  
830 place cell directionality: additional evidence of prospective coding in the hippocampus.  
831 *The Journal of neuroscience : the official journal of the Society for Neuroscience* *24*, 4541-  
832 4550.
- 833 19. Scleidorovich, P., Llofriu, M., Fellous, J.M., and Weitzenfeld, A. (2020). A computational  
834 model for spatial cognition combining dorsal and ventral hippocampal place field maps:  
835 multiscale navigation. *Biological cybernetics* *114*, 187-207.
- 836 20. Geva-Sagiv, M., Las, L., Yovel, Y., and Ulanovsky, N. (2015). Spatial cognition in bats  
837 and rats: from sensory acquisition to multiscale maps and navigation. *Nature reviews.*  
838 *Neuroscience* *16*, 94-108.



- 839 21. Harland, B., Contreras, M., and Fellous, J.M. (2017). A role for the longitudinal axis of the  
840 hippocampus in multiscale representations of large and complex spatial environments and  
841 mnemonic hierarchies. In *The Hippocampus – Plasticity and Functions*. (InTechOpen), pp.  
842 67-104.
- 843 22. Fyhn, M., Molden, S., Witter, M.P., Moser, E.I., and Moser, M.B. (2004). Spatial  
844 representation in the entorhinal cortex. *Science* 305, 1258-1264.
- 845 23. Feldman, J. (2013). The neural binding problem(s). *Cognitive neurodynamics* 7, 1-11.
- 846 24. Barry, C., Lever, C., Hayman, R., Hartley, T., Burton, S., O'Keefe, J., Jeffery, K., and  
847 Burgess, N. (2006). The boundary vector cell model of place cell firing and spatial  
848 memory. *Reviews in the neurosciences* 17, 71-97.
- 849 25. Deshmukh, S.S., and Knierim, J.J. (2013). Influence of local objects on hippocampal  
850 representations: Landmark vectors and memory. *Hippocampus* 23, 253-267.
- 851 26. Strange, B.A., Witter, M.P., Lein, E.S., and Moser, E.I. (2014). Functional organization of  
852 the hippocampal longitudinal axis. *Nature reviews. Neuroscience* 15, 655-669.
- 853 27. Poucet, B., Thinus-Blanc, C., and Muller, R.U. (1994). Place cells in the ventral  
854 hippocampus of rats. *Neuroreport* 5, 2045-2048.
- 855 28. Baumann, O., and Mattingley, J.B. (2013). Dissociable representations of environmental  
856 size and complexity in the human hippocampus. *The Journal of neuroscience : the official*  
857 *journal of the Society for Neuroscience* 33, 10526-10533.
- 858 29. Brunec, I.K., Bellana, B., Ozubko, J.D., Man, V., Robin, J., Liu, Z.X., Grady, C.,  
859 Rosenbaum, R.S., Winocur, G., Barense, M.D., et al. (2018). Multiple Scales of  
860 Representation along the Hippocampal Anteroposterior Axis in Humans. *Current biology*  
861 : CB 28, 2129-2135 e2126.
- 862 30. Evensmoen, H.R., Ladstein, J., Hansen, T.I., Moller, J.A., Witter, M.P., Nadel, L., and  
863 Haberg, A.K. (2015). From details to large scale: the representation of environmental  
864 positions follows a granularity gradient along the human hippocampal and entorhinal  
865 anterior-posterior axis. *Hippocampus* 25, 119-135.
- 866 31. Brunec, I.K., Robin, J., Patai, E.Z., Ozubko, J.D., Javadi, A.H., Barense, M.D., Spiers, H.J.,  
867 and Moscovitch, M. (2019). Cognitive mapping style relates to posterior-anterior  
868 hippocampal volume ratio. *Hippocampus*.
- 869 32. Maguire, E.A., Gadian, D.G., Johnsrude, I.S., Good, C.D., Ashburner, J., Frackowiak, R.S.,  
870 and Frith, C.D. (2000). Navigation-related structural change in the hippocampi of taxi  
871 drivers. *Proc Natl Acad Sci U S A* 97, 4398-4403.
- 872 33. Maguire, E.A., Woollett, K., and Spiers, H.J. (2006). London taxi drivers and bus drivers:  
873 a structural MRI and neuropsychological analysis. *Hippocampus* 16, 1091-1101.
- 874 34. Grieves, R.M., Jedidi-Ayoub, S., Mishchanchuk, K., Liu, A., Renaudineau, S., and Jeffery,  
875 K.J. (2020). The place-cell representation of volumetric space in rats. *Nature*  
876 *Communications* 11, 789.
- 877 35. Bellmund, J.L.S., Gärdenfors, P., Moser, E.I., and Doeller, C.F. (2018). Navigating  
878 cognition: Spatial codes for human thinking. *Science (New York, N.Y.)* 362, eaat6766.
- 879 36. Henriksen, E.J., Moser, M.-B., and Moser, E.I. (2009). Megaspace recordings from  
880 hippocampal place cells and entorhinal grid cells. In *Society for Neuroscience*.
- 881 37. Gruene, T.M., Flick, K., Stefano, A., Shea, S.D., and Shansky, R.M. (2015). Sexually  
882 divergent expression of active and passive conditioned fear responses in rats. *eLife* 4.

- 883 38. Valdes, J.L., McNaughton, B.L., and Fellous, J.M. (2015). Offline reactivation of  
884 experience-dependent neuronal firing patterns in the rat ventral tegmental area. *Journal of*  
885 *neurophysiology* *114*, 1183-1195.
- 886 39. Paxinos, G., and Watson, C. (2007). *The rat brain in stereotaxic coordinates*, 6th Edition,  
887 (Amsterdam ; Boston ;: Academic Press/Elsevier).
- 888 40. Xiao, Z., Lin, K., and Fellous, J.M. (2020). Conjunctive reward-place coding properties of  
889 dorsal distal CA1 hippocampus cells. *Biological cybernetics* *114*, 285-301.
- 890 41. Huxter, J., Burgess, N., and O'Keefe, J. (2003). Independent rate and temporal coding in  
891 hippocampal pyramidal cells. *Nature* *425*, 828-832.
- 892 42. Markus, E.J., Barnes, C.A., McNaughton, B.L., Gladden, V.L., and Skaggs, W.E. (1994).  
893 Spatial information content and reliability of hippocampal CA1 neurons: effects of visual  
894 input. *Hippocampus* *4*, 410-421.
- 895 43. Grieves, R.M., Jenkins, B.W., Harland, B.C., Wood, E.R., and Dudchenko, P.A. (2016).  
896 Place field repetition and spatial learning in a multicompartiment environment.  
897 *Hippocampus* *26*, 118-134.
- 898 44. Harland, B., Grieves, R.M., Bett, D., Stentiford, R., Wood, E.R., and Dudchenko, P.A.  
899 (2017). Lesions of the Head Direction Cell System Increase Hippocampal Place Field  
900 Repetition. *Current Biology* *27*, 2706-2712.e2702.  
901

1  
2  
3  
4  
5  
6  
7  
8  
9  
10  
11  
12  
13  
14  
15  
16  
17  
18  
19  
20  
21  
22  
23  
24  
25

## Supplementary Materials for

# Dorsal CA1 Hippocampal Place Cells Form a Multi-Scale Representation of Megaspaces

**Authors:** Bruce Harland, Marco Contreras, Madeline Souder, and Jean-Marc Fellous\*

\*Correspondence to: Jean-Marc Fellous; [fellous@email.arizona.edu](mailto:fellous@email.arizona.edu)

### **This Document includes:**

Supplementary Figs. S1 to S6

Supplemental References List

Title and Short Legend for Supplementary Movie S1

**Other Supplementary Materials for this manuscript include the following:**

Supplementary Movie S1

26 **Figure S1, related to Figure 1**

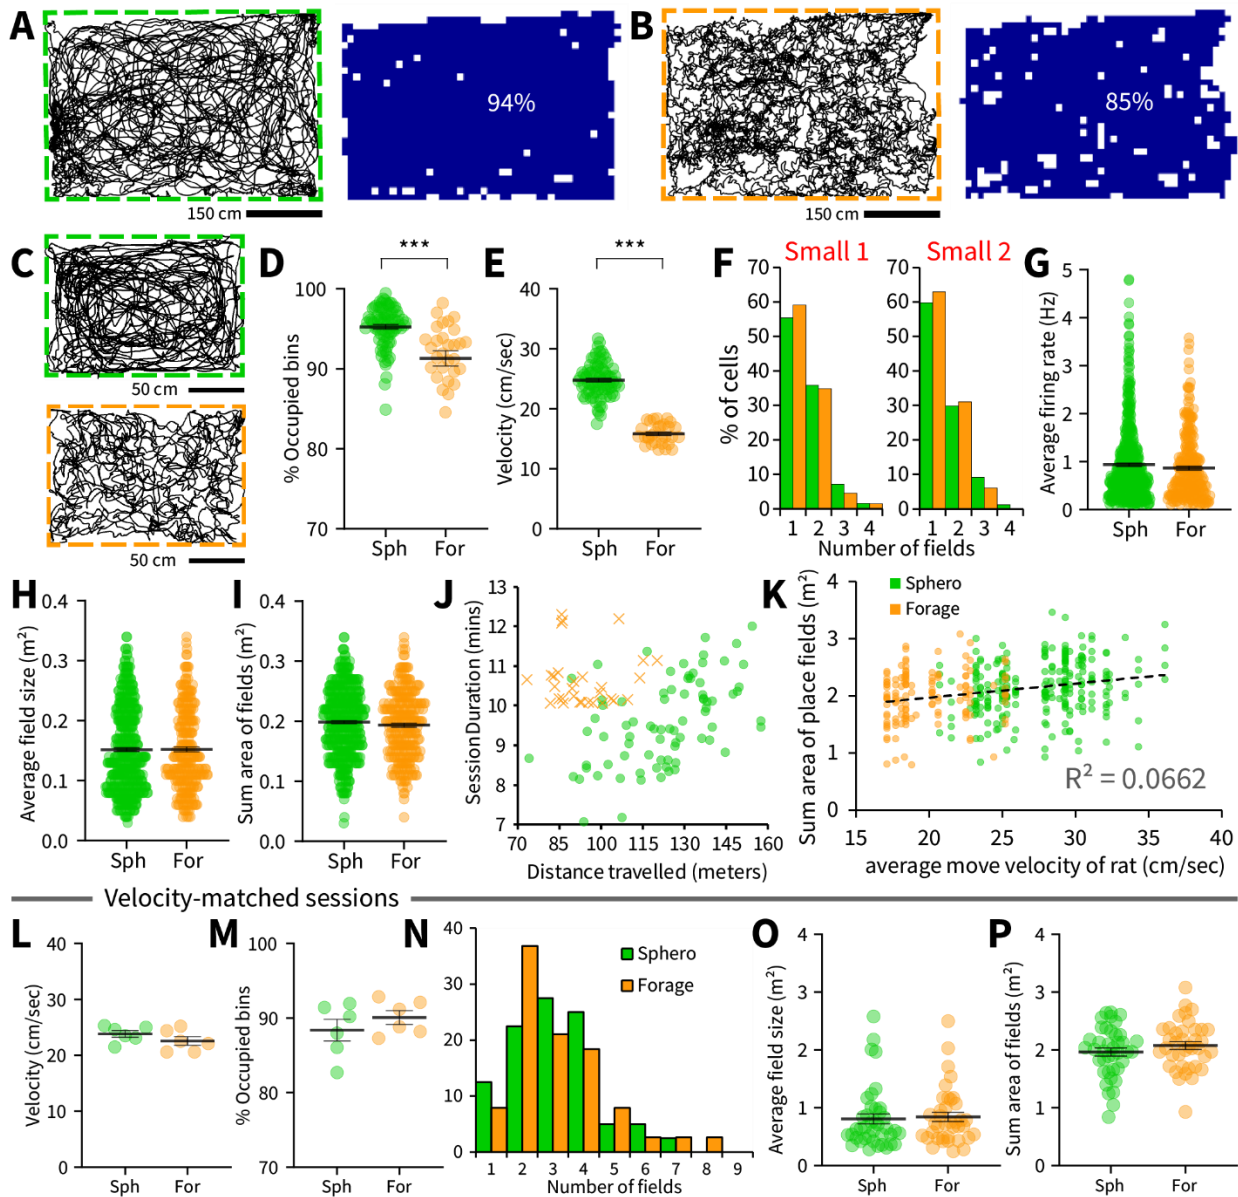

27  
 28 **Fig. S1: Robot-following facilitated greater speed and coverage in both environments.** (A)  
 29 Examples of tracking data from a representative ‘Sphero’ robot-following and (B) a representative  
 30 foraging session in the megaspace. On the right of each, the occupancy map for each session that  
 31 were used to calculate “coverage” of the environment. Percentages show the ratio of filled (blue  
 32 squares) compared to empty (white squares) occupancy bins. (C) Example trajectories in the small  
 33 environment from a (top) robot following, and (bottom) foraging session. (D) The fraction of the  
 34 room covered by the occupancy map and (E) rat average velocity in the small environments, were  
 35 greater during robot-following than during foraging sessions (One-way Anova’s:  $F_{(1,53)} = 54.26$ ,  $P$   
 36  $<0.0001$  and  $F_{(1,53)} = 25.43$ ,  $P <0.0001$ , respectively). (F-I) However, there was no significant  
 37 difference in place cell characteristics in the small environment between robot following and  
 38 foraging sessions (number of fields,  $F_{(1,764)} = 2.13$ ,  $P = 0.15$ ; average firing rate,  $F_{(1,764)} = 1.48$ ,  $P$   
 39  $= 0.22$ ; mean size of place fields,  $F_{(1,764)} = 0.001$ ,  $P = 0.97$ ; sum area of place fields,  $F_{(1,764)} = 1.69$ ,  
 40  $P = 0.19$ ). (J) Session duration (mins) vs distance travelled (m) is plotted for small environment

41 recordings; Sphero-following shown in green circles, foraging shown in orange crosses. **(K)** The  
42 sum area of subfields in the megaspace for all robot following and foraging sessions is plotted  
43 against the velocity of the animal. The weak positive correlation ( $r = 0.26$ ) suggested that the lower  
44 sum area of fields in the megaspace for foraging sessions may be related to lower average velocity.  
45 Therefore, we compared a sub-set of velocity-matched robot following and foraging sessions ( $n =$   
46  $6$  each), in which **(L)** velocity and **(M)** fraction of occupied bins were not significantly different  
47 from each other (One way Anova's, Average velocity:  $F_{(1,10)} = 1.69$ ,  $P = 0.22$ ; % Occupied bins:  
48  $F_{(1,10)} = 0.97$ ,  $P = 0.35$ ). **(N)** The number of subfields ( $F_{(1,76)} = 0.0004$ ,  $P = 0.98$ ), **(O)** average  
49 subfield size ( $F_{(1,76)} = 0.08$ ,  $P = 0.77$ ), and **(P)** sum area of subfields ( $F_{(1,76)} = 1.34$ ,  $P = 0.25$ ) per  
50 cell did not differ for the 40 robot following place cells and 38 foraging place cells from these  
51 velocity-matched sessions. For all panels  $** = P < 0.001$ ,  $*** = P < 0.0001$ .

52

53

54 **Figure S2, related to Figure 1**

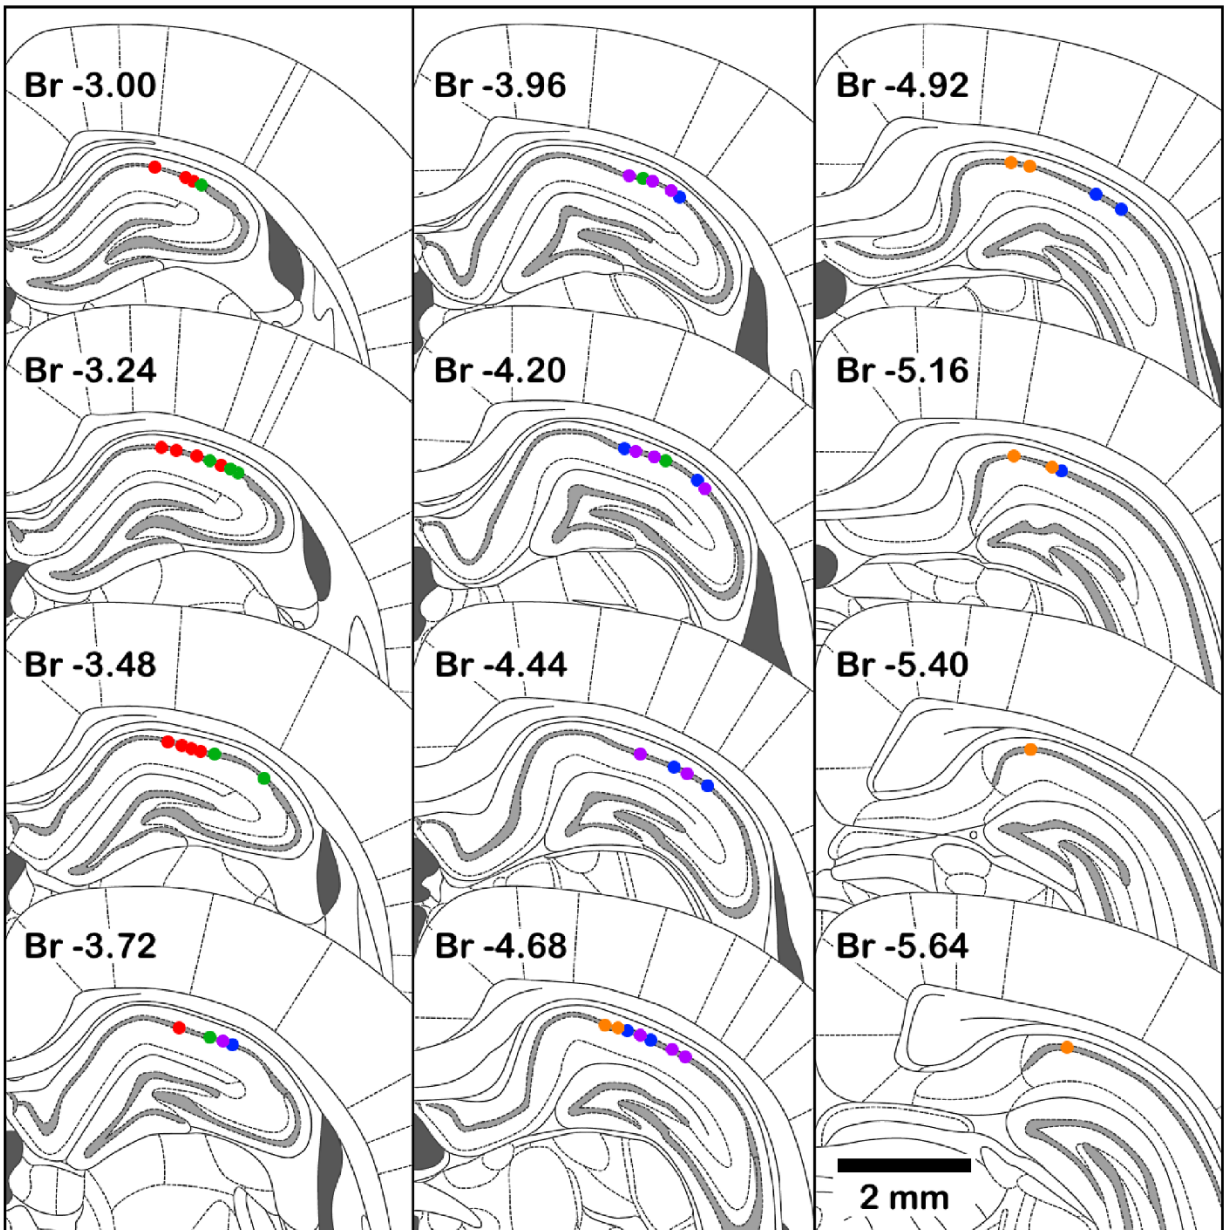

55  
56 **Fig. S2: Tetrode locations in the dorsal CA1 cell body layer.** Coronal atlas plates (Paxinos and  
57 Watson, 2006) are shown, ordered moving down through the columns from left to right in steps of  
58 0.24 mm, with the distance from bregma (mm) shown for each plate. Tetrode intersections with  
59 the CA1 cell body layer were marked on photomicrographs of cresyl violet stained sections taken  
60 from each rat which were matched to all available Atlas Plates staggered in distances of 0.12 - 0.16  
61 mm apart (more plates than are shown here). All tetrode positions in dorsal CA1 are shown on the  
62 closest template in five colors, one for each rat. Three tetrodes were found to be located outside  
63 CA1, in the CA2 region, and were not included in the data set (not shown).

64 **Figure S3, related to Figure 2**

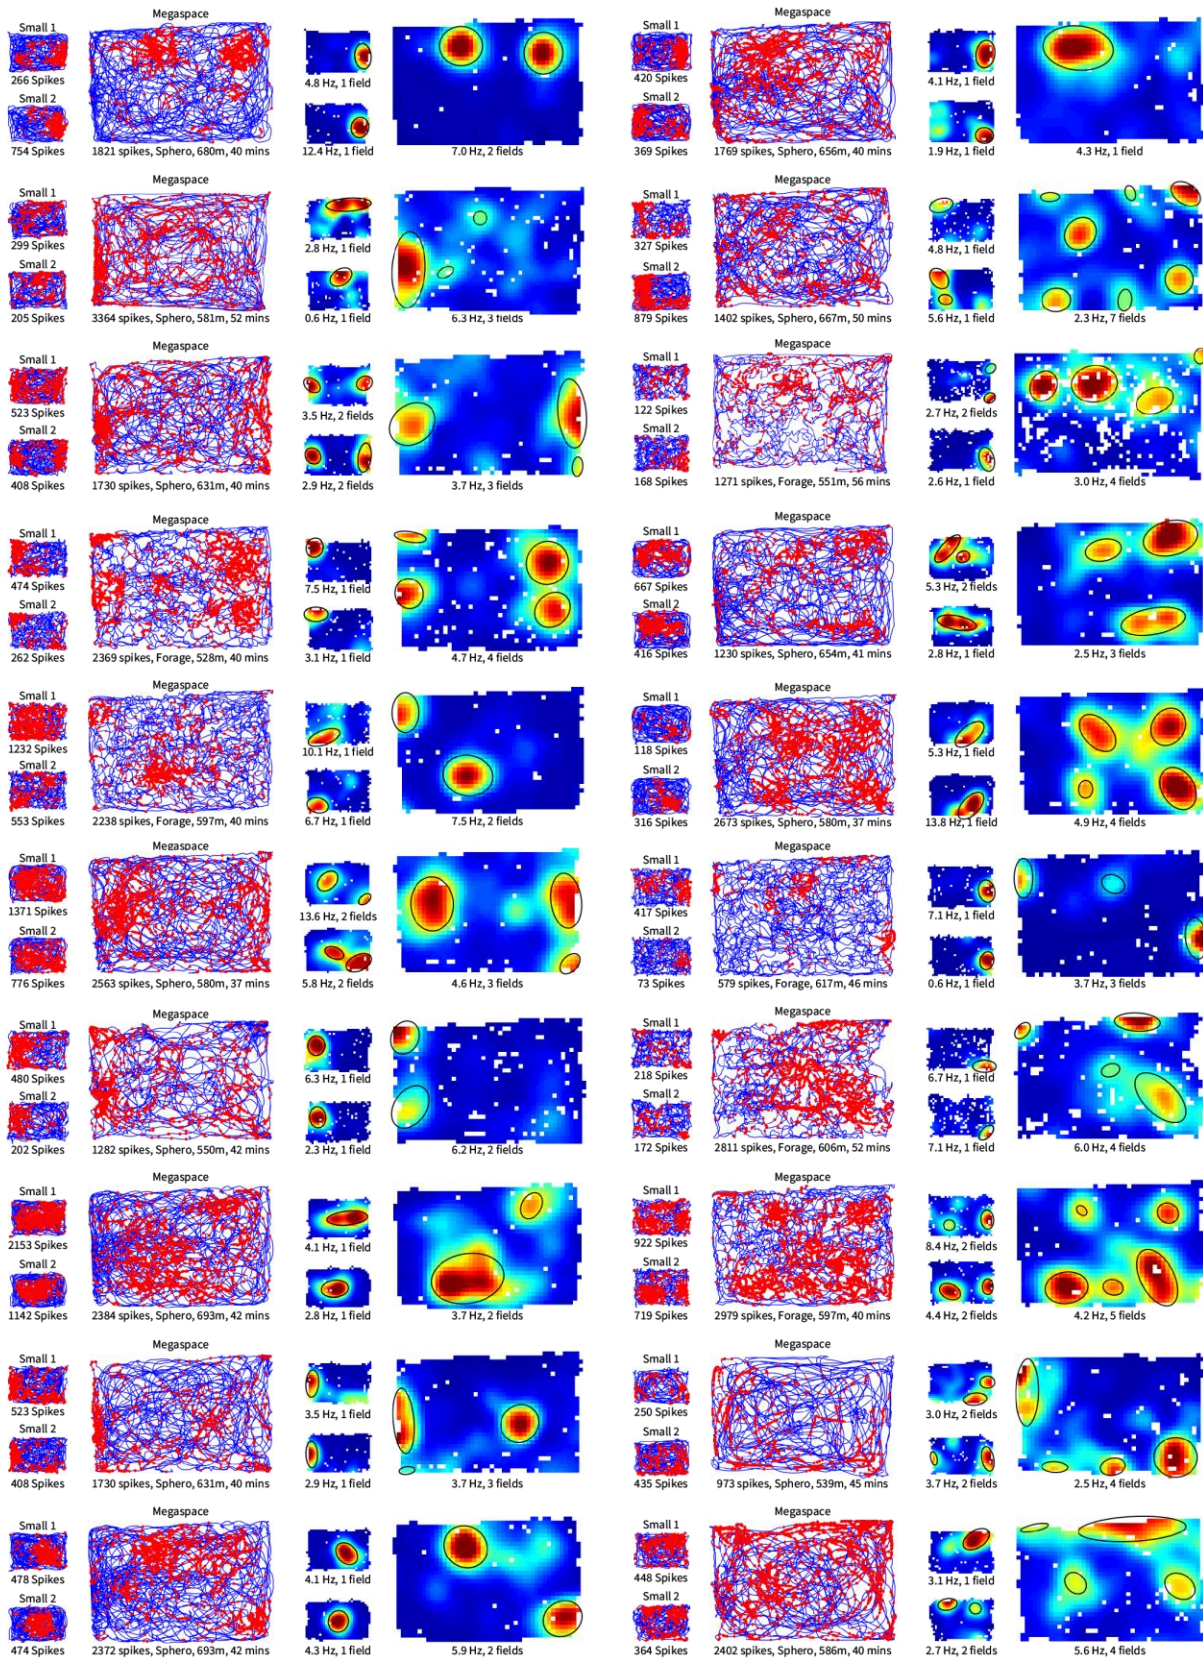

66 **Fig. S3: Additional example place cells with raw spike plots.** These example cells show a  
67 representative sample of the variety of place cell firing observed both in the megaspace and small  
68 environments. Twenty different place cells are shown from the main experimental sessions (Small  
69 1 – Megaspace – Small 2, for each cell) in 2 columns of 10 rows. On the left side of each example,  
70 the trajectory of the animal is shown (blue line) with cell firing plotted on top (red dots). On the  
71 right side of each example, the firing rate maps are shown; the peak firing rate (Hz) and number  
72 of place subfields are listed underneath each. High firing rates are represented by hot colours, and  
73 white bins show regions that were not covered sufficiently by the animal. Ellipsoids are plotted  
74 based on the parameters of each place field to aid with visualization.



75 **Figure S4, related to Figure 2**

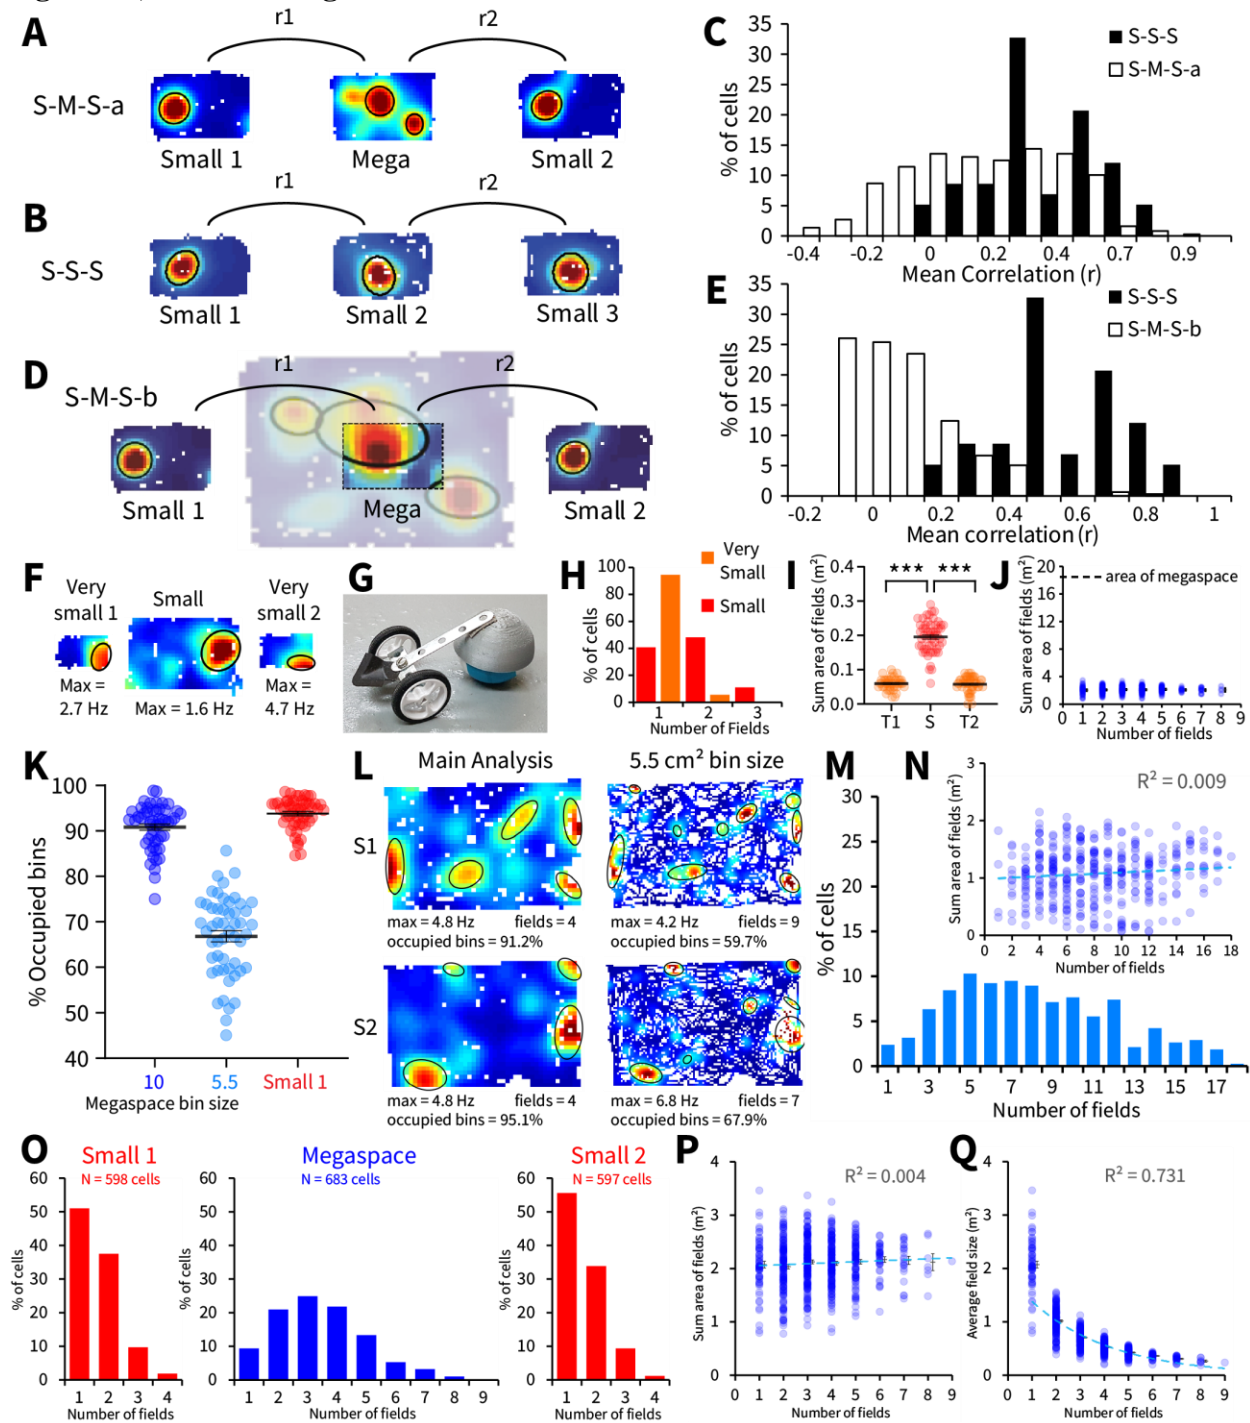

76  
 77 **Fig. S4: Place cell firing in the megaspace is unrelated to the small environment, and cannot**  
 78 **be explained by the recording setup, bin-size, or criterion for cell inclusion (A)** We examined  
 79 whether place cell firing in the different environments was related by re-scaling the megaspace  
 80 place maps and directly comparing with the same cell's spatial firing in the small environments.  
 81 Pearson correlations between Small 1 and the re-sized megaspace map (r1), and Small 2 and the  
 82 re-sized megaspace map (r2) were averaged for each cell (S-M-S-a). (B) These correlations were  
 83 compared to r1 and r2 averaged for each place cell from control sessions in which the small

84 environment was experienced three consecutive times (S-S-S). (C) The distributions of S-S-S and  
85 S-M-S-a correlations were significantly different ( $t_{(438)} = -11.45$ ,  $P < 0.0001$ ). (D) We also looked  
86 at whether place cell firings in the small environments were related to their firing in the specific  
87 section of megaspace floor-space shared by the small environments (S-M-S-b; yellow-dotted lines  
88 in Fig. 1A). (E) Again, we found that distributions of S-S-S and S-M-S-b correlations were also  
89 significantly different ( $t_{(438)} = 18.38$ ,  $P < 0.0001$ ). (F) Example place cells recorded in additional  
90 sessions in a very small environment (90 x 60 cm), before and after the small environment (180 x  
91 120 cm). (G) In the limited space of the very small environment, a smaller version of the robot  
92 (Mini Sphero) housed inside a homemade cart was used. (H) Similarly to previous studies using a  
93 'classic'  $<1\text{m}^2$  environment, we found that the majority (95%) of place cells had only one place  
94 field. Place cells had more subfields in the small compared to both very small environments which  
95 had comparable numbers of fields ( $F_{(2,141)} = 35.75$ ,  $P < 0.0001$ ; Tukey post-hoc tests, Small vs.  
96 Very small 1 and Small vs. Very small 2,  $P$ 's  $< 0.0001$ , Very small 1 vs. Very small 2,  $P = 0.98$ ).  
97 (I) Total area of all place fields was greater in the Small compared to both Very small environments  
98 which did not differ ( $F_{(2,141)} = 298.05$ ,  $P < 0.0001$ ; Tukey post-hoc tests, Small vs Very small 1  
99 and Small vs Very small 2,  $P$ 's  $< 0.0001$ , Very small 1 vs Very small 2,  $P = 0.96$ ). (J) The same  
100 graph from Fig. 2I showing the sum area of place fields for cells with different numbers of  
101 subfields, but with y-axis extended up to the size of the megaspace ( $18.55\text{ m}^2$ ). (K) We used a  
102 larger bin size for the megaspace compared to the small environment in order to normalize the  
103 occupancy between the two environments. Using the lower bin size (5.5) in the megaspace resulted  
104 in greatly reduced % coverage of the space to levels traditionally not acceptable for place field  
105 computation ( $<90\%$ ). Using such small bin sizes would require running the animal much longer,  
106 to extents not possible with the current wireless technology. We re-analyzed the megaspace, using  
107 the same bin-size as we used in the small environment. (L) Two example cells are shown with the  
108 larger bin size on the left, and smaller bin size on the right. The smaller bin size had more place  
109 subfields, some of which appear to be 'true subfields' correctly separated at the lower bin size,  
110 whereas others are incorrectly separated due to more gaps in the place map from unoccupied bins.  
111 (M) Despite the greater number of subfields per cell in the megaspace, (N) the sum area of  
112 subfields per cell and numbers of subfields per cell remained uncorrelated. In our main analysis,  
113 we excluded place cells that did not fire during all three environment visits, as well as place cells  
114 with insufficiently stable firing between Small 1 and Small 2. Here, we re-analyzed the data to  
115 include this larger cell population in order to verify that our findings are not associated with the  
116 place cell criterion used in the manuscript. (O) This larger cell population had a comparable  
117 distribution of place fields to the more restricted cell population for the megaspace and Small 2,  
118 but the Small 1 distribution differed (One way Anova's; Megaspace:  $F_{(1,1064)} = 0.53$ ,  $P = 0.47$ ;  
119 Small 2:  $F_{(1,978)} = 2.54$ ,  $P = 0.11$ ; Small 1:  $F_{(1,979)} = 4.23$ ,  $P < 0.05$ ). The difference in the small  
120 environment for the larger cell population was a slight decrease in the proportion of cells with only  
121 1 subfield, and a slight increase in the proportion of cells with 2-4 subfields. (P) The sum area of  
122 subfields and number of subfields per cell remained uncorrelated and (Q) the relationship between  
123 average place field size and number of place fields per cell stayed consistent with the larger cell  
124 population. For all panels \*\*\* =  $P < 0.0001$ .

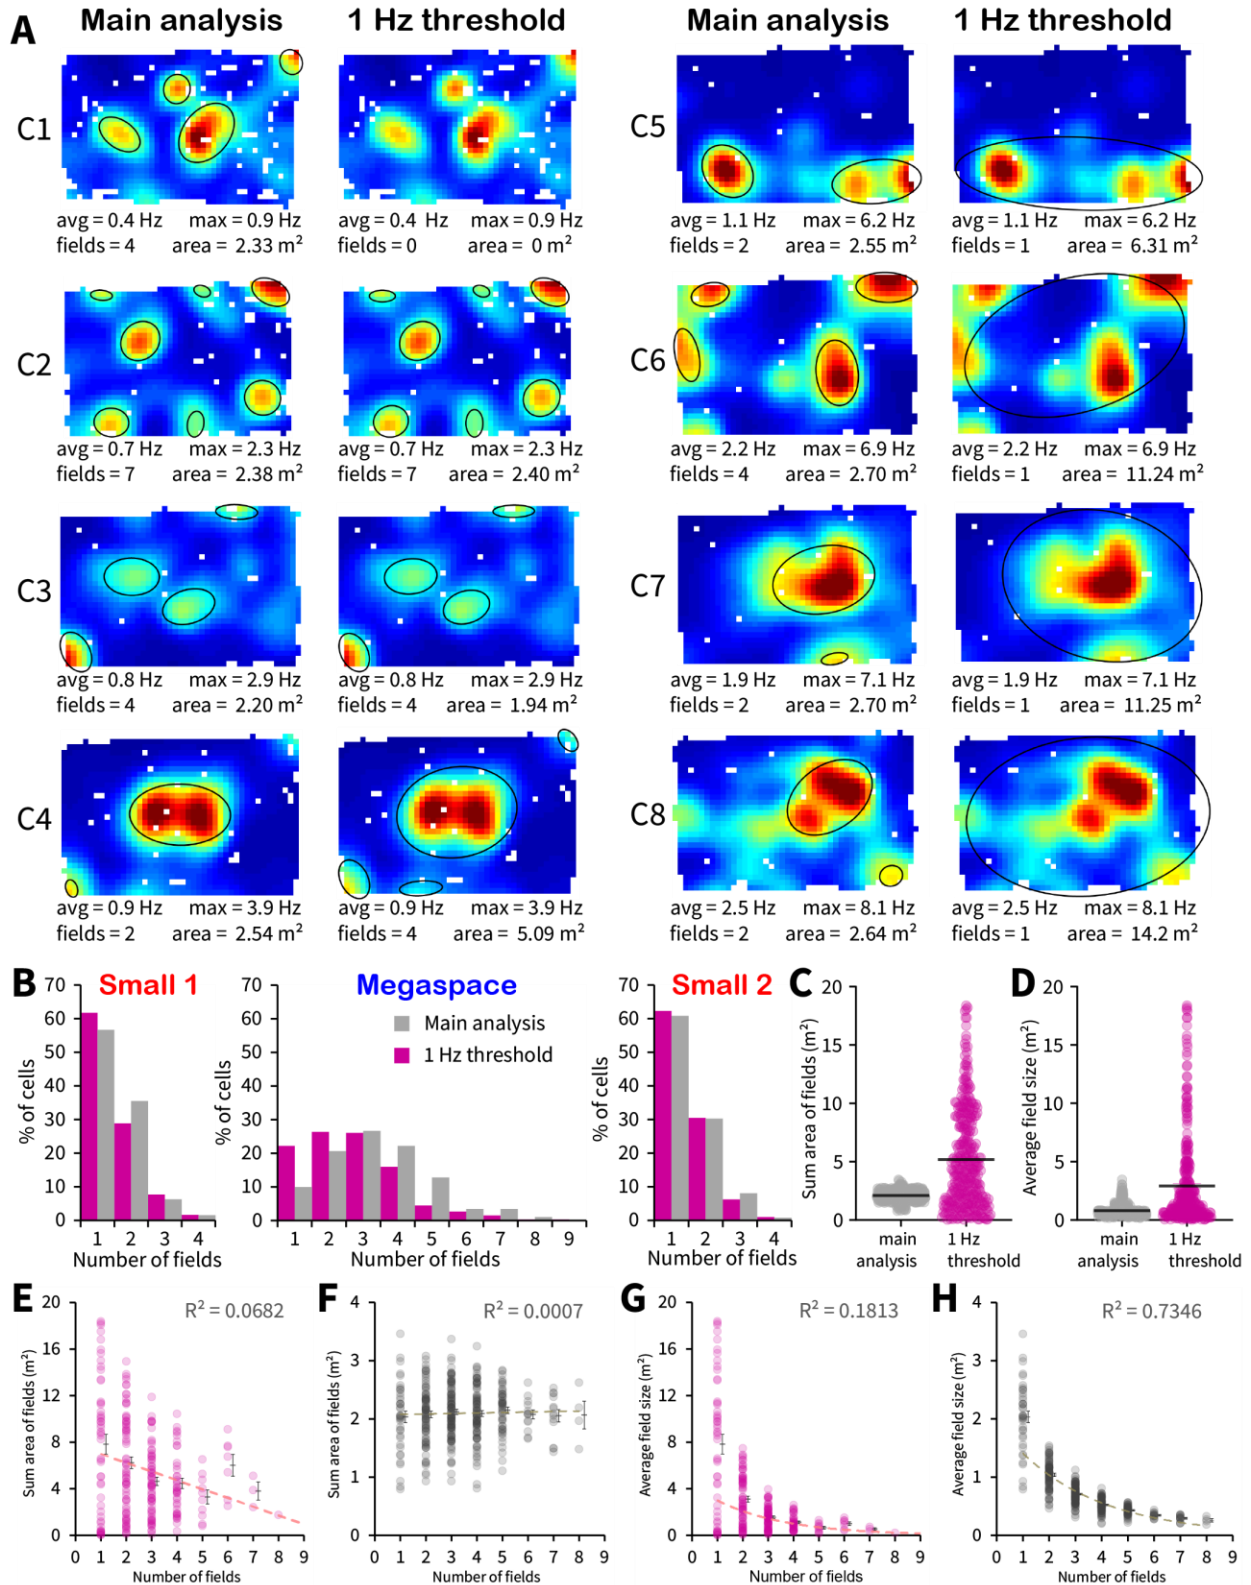

125  
 126  
 127  
 128

**Fig. S5: Place subfields still ranged in size, and cells with different numbers of subfields had similar average sum area when fields were defined with a fixed 1 Hz threshold. (A)** Multiple example cells (C1 – C8) are shown showing place fields designated using the standard deviation

129 method from the main analysis on the left side of each example, and place fields designated with  
130 a 1 Hz common threshold on the right side of each example [S1]. The examples cells are shown in  
131 order of firing rate from low (C1) through to high (C8). The common threshold method gives  
132 similar results to the mean + 1.2 standard deviation method for cells with intermediate values for  
133 maximum and average firing rates like C2 and C3. For cells with higher firing rates, the common  
134 threshold can label additional fields that fell below the threshold using the standard deviation  
135 method, see C4, but in many cases also combine fields that appear separate in the place map, such  
136 as with cell C5. This is because the permissive 1 Hz criterion props up weak bins in between strong  
137 bins, and this propping-up links the subfields together instead of separating them. This linkage  
138 produces abnormally large fields. Low firing rate place cells like C1 are not labelled with any place  
139 fields using the common threshold method; 45 out of 383 place cells in the megaspace (13.3%)  
140 were labelled with 0 place fields, and these ‘non-active’ cells are not included in the subsequent  
141 panels. For the highest firing rate place cells, the common threshold joined up place fields that  
142 appear separate on the place map to produce very large fields and sum areas as in C6, C7, and C8.  
143 **(B)** The 1 Hz common threshold resulted in a different distribution of number of fields in the  
144 megaspace with more cells having only 1 or 2 fields, but in the small environments the distribution  
145 of number of fields is comparable to place field labelling with the standard deviation method.  
146 There was a larger range in **(C)** sum area of subfields per cell and **(D)** average subfield size per  
147 cell in the megaspace using the fixed 1 Hz common threshold method, due to some very large  
148 place fields contributed by the higher firing rate cells. **(E)** There was a tendency for average sum  
149 area of place fields to reduce the more subfields a cell had compared with **(F)** the same graph  
150 produced using the cell-specific standard deviation method. **(G)** The tendency for average place  
151 field size to reduce, the more subfields a cell had in the megaspace, also persisted, but was weaker  
152 and noisier than when **(H)** the standard deviation method was used to label place fields in the  
153 megaspace.  
154  
155

156 **Figure S6, related to Figure 2 and 3**

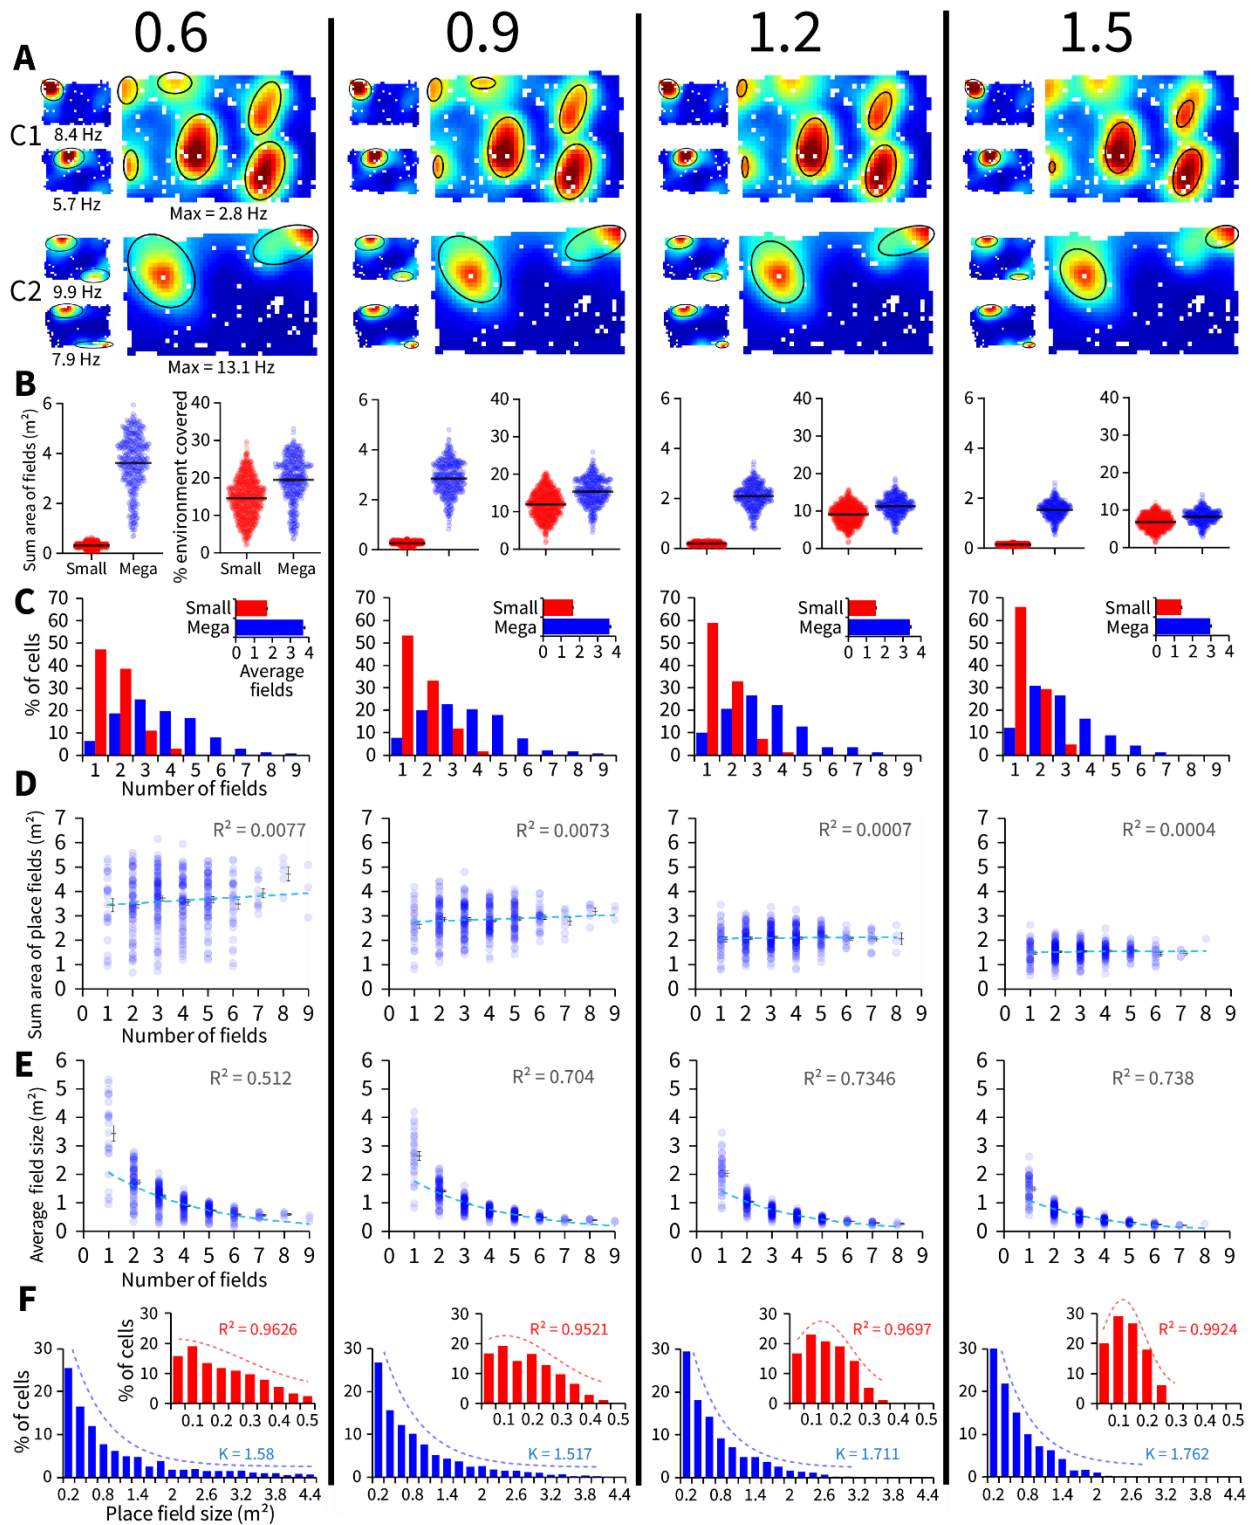

157  
158 **Fig. S6: The differences between place subfield structure in the small environments and**  
159 **megaspace were consistent across different thresholds for place field labelling. (A)** Examples  
160 of place maps from two place cells (C1 and C2) thresholded at 0.6, 0.9, 1.2, 1.5 (left to right  
161 columns) standard deviations above their mean firing rate for the identification of place fields.

162 Small 1 is shown in the top left, and Small 2 is shown in the bottom right for each panel. Cell C1  
163 gives an example of how different numbers of fields can be labelled as the threshold changes. Cell  
164 C2 gives an example of a cell in which only the size of the subfields change with threshold, but  
165 the number of subfields remains robustly constant in both small and large environments. **(B)** Sum  
166 area of all place fields and percentage of the environment covered by place fields are shown for  
167 each cell in the small environment (red), and megaspace (blue). **(C)** Number of place subfields per  
168 cell and average for all cells are shown in inset. As expected, the higher the threshold used, the  
169 smaller the area of subfields, and the fewer the number of subfields identified in both the small  
170 environment and megaspace. These effects were more pronounced in the megaspace due to its  
171 higher ceiling for these values. Across the different thresholds, **(D)** the sum area of all subfields  
172 and the number of subfields a cell had in the megaspace remained uncorrelated. **(E)** Similarly, the  
173 gradual decay of average field size in the megaspace as a function of the number of subfields  
174 persists. **(F)** Distribution of subfield sizes for the population of subfields pooled from all cells in  
175 the megaspace (blue) and small (red, inset) environments. In the megaspace this distribution was  
176 well fitted by a negative exponential curve, the rate of decay ( $K =$ ) is listed for each threshold. In  
177 the small environment the distribution was gaussian at higher thresholds, and more linear at lower  
178 thresholds, the coefficient of determination ( $R^2$ ) is listed for each threshold.

179  
180  
181  
182  
183  
184  
185  
186  
187  
188  
189  
190  
191  
192  
193  
194  
195  
196  
197  
198  
199  
200  
201  
202  
203  
204  
205  
206  
207

208 **Supplemental References List:**

209

- 210 S1. Muller, R.U., and Kubie, J.L., Ranck Jr, J.B. (1987). Spatial firing patterns of  
211 hippocampal complex-spike cells in a fixed environment. *The Journal of neuroscience :*  
212 *the official journal of the Society for Neuroscience* 7, 1935-1950.

213

214

215

216

217

218

219

220

221

222

223

224

225

226

227

228

229

230

231

232

233

234

235

236

237

238

239

240

241

242

243

244

245

246

247

248

249

250

251

252

253

254 **Movie S1: Title and Short Legend**

255

256

257

258 **Movie Title:** Place Cell Recordings in a Megaspaces

259

260 **Short Legend:** Place cells are wirelessly recorded from the hippocampus in rats as they follow a  
261 small robot. Between small environments, the rat is recorded in a very large ‘megaspaces’. Place  
262 cells in the megaspaces cover a similar total area but are fragmented into different numbers of  
263 subfields. These subfields vary in size, so that the population of place cells forms a multi-scale  
264 representation in the megaspaces capable of supporting both coarse- and fine-grained  
265 representations of the environment. Additional recordings in environments of increasing scales  
266 show that the total area covered by each place cell is comparable within each environmental scale.
